1 **Synaptonemal complex architecture facilitates the chromosome-specific regulation of**  
2 **recombination in Drosophila**

3 Cori K. Cahoon\*, G. Matthew Heenan\*, Zulin Yu\*, Jay R. Unruh\*, Sean McKinney\*, and R. Scott  
4 Hawley\*<sup>‡</sup>

5  
6 \* Stowers Institute for Medical Research, Kansas City, MO, United States of America

7 ‡ Department of Molecular and Integrative Physiology, University of Kansas Medical Center,  
8 Kansas City, KS, United States of America

9  
10 **Corresponding Author:**

11 R. Scott Hawley

12 Stowers Institute for Medical Research

13 Kansas City, MO 64110

14 Phone (816) 926-4427

15 Fax (816) 926-2060

16 [rsh@stowers.org](mailto:rsh@stowers.org)

17

18

19 **Key words:** synaptonemal complex, meiosis, homologous recombination, crossover, crossover  
20 interference

21

## 22 **Abstract**

23 In *Drosophila*, meiotic recombination is initiated by the formation of programmed DNA double-  
24 strand breaks (DSBs), which occur within the context of the synaptonemal complex (SC). To  
25 better understand the role of the SC in mediating recombination we created an in-frame deletion  
26 mutant in *c(3)G* (deleting amino acids L340 to N550, denoted as *c(3)G<sup>ccΔ1</sup>*), which encodes the  
27 major transverse filament protein of the SC. Although *c(3)G<sup>ccΔ1</sup>* oocytes assemble ribbon-like  
28 SC and exhibit normal DSB formation, the euchromatic SC precociously disassembles into  
29 fragments that persist until mid to late pachytene in both *c(3)G<sup>ccΔ1</sup>* heterozygotes and  
30 homozygotes. Centromeric SC, however, is unaffected in both genotypes. Thus, *c(3)G<sup>ccΔ1</sup>* is a  
31 separation-of-function mutant that establishes different functional and structural requirements  
32 between euchromatic and centromeric SC. Our data also demonstrate that the chromosome  
33 arms differ in their sensitivity to *c(3)G<sup>ccΔ1</sup>*-induced perturbations in the SC. The X chromosome is  
34 distinctly sensitive to these perturbations, such that euchromatic pairing and crossing over are  
35 altered in *c(3)G<sup>ccΔ1</sup>* heterozygotes and severely reduced in *c(3)G<sup>ccΔ1</sup>* homozygotes. On the  
36 autosomes, crossovers are shifted to centromere-proximal regions and crossover interference is  
37 defective in both *c(3)G<sup>ccΔ1</sup>* homozygotes and heterozygotes. However, only *c(3)G<sup>ccΔ1</sup>*  
38 homozygotes display a progressive loss of euchromatic pairing in distal autosomal regions,  
39 suggesting that discontinuity in the euchromatic SC—rather than failed pairing—might cause the  
40 altered crossover distribution. These phenotypes reveal that different chromatin states or  
41 regions have differing requirements to maintain both the SC and homologous pairing.  
42 Furthermore, *c(3)G<sup>ccΔ1</sup>* is the first mutant in *Drosophila* to demonstrate that the SC appears to  
43 facilitate the regulation of recombination frequency and distribution differently on each  
44 chromosome.

45

46 **Author Summary**

47 Chromosome segregation errors during meiosis are the leading cause of miscarriage and birth  
48 defects in humans. To prevent these errors from occurring, meiotic cells have evolved multiple  
49 mechanisms to ensure that each gamete receives exactly half the number of chromosomes.  
50 During meiosis I, this is accomplished by forming a crossover between homologous  
51 chromosomes, which is facilitated by a large protein complex called the synaptonemal complex  
52 (SC). The SC is assembled between homologous chromosomes during early prophase I, and it  
53 is unclear how the SC regulates the position and number of crossovers each homolog receives.  
54 To better understand the role of the SC in mediating recombination, we created an in-frame  
55 deletion mutant in *Drosophila melanogaster* in the gene encoding the C(3)G protein, the major  
56 transverse filament protein of the SC. Although mutant oocytes assemble ribbon-like SC, the SC  
57 along the chromosome arms precociously disassembles in early meiosis. Surprisingly, the SC  
58 around the centromeres is unaffected in these mutants, suggesting that the requirements for SC  
59 formation may differ depending on where the SC is located along the chromosomes. Our data  
60 also demonstrate that the chromosome arms differ in their sensitivity to the mutant-induced  
61 perturbations of the SC in both crossing over and homolog pairing.

## 62 INTRODUCTION

63 At the beginning of meiotic prophase, homologous chromosomes must identify each other, pair,  
64 and initiate recombination. Meiotic recombination is critical for the proper segregation of  
65 homologous chromosomes during meiosis I. The failure to properly exchange genetic  
66 information will frequently result in missegregation of the chromosomes leading to eggs and  
67 sperm with the incorrect number of chromosomes. Indeed, errors in meiotic chromosome  
68 segregation are the leading cause of miscarriage and aneuploidy in humans, which can result in  
69 chromosomal disorders such as Down syndrome and Turner syndrome (reviewed in [1]).

70 To initiate recombination, a series of programmed DNA double-strand breaks (DSBs)  
71 are formed by the topoisomerase-like enzyme Spo11 [2]. Most organisms make a large excess  
72 of DSBs—in some cases 30 times more than necessary—since only a small fraction of DSBs  
73 will be repaired into crossovers [reviewed in 3]. Some organisms appear to use DSBs to identify  
74 homology, and it is thought that creating more DSBs than necessary helps to ensure that  
75 homologs are able to properly pair and that each chromosome receives at least one crossover  
76 [reviewed in 4].

77 Neither DSBs nor crossovers are randomly distributed along chromosome arms, but  
78 rather seem to be placed in a fairly ordered manner. Fine-scale genomic analysis of the  
79 nonrandom distribution of DSBs in mice and yeast has indicated that the location of DSBs  
80 involves a complicated series of factors working together on both a local DNA sequence level  
81 and on a global chromatin architecture level [5, 6]. Moreover, the nonrandom distribution of the  
82 resulting crossovers varies depending on the organism. Some organisms, like *Drosophila*, place  
83 most of their crossovers in the middle of the chromosome arms, while other organisms, like  
84 grasshoppers, planarians and nematodes, position crossovers at the distal regions of  
85 chromosome arms [reviewed in 7] [8]. This suggests that there may be multiple mechanisms

86 that can determine the position of DSBs along the chromosome arms and that only certain  
87 DSBs can become crossovers.

88 In *Drosophila*, approximately one crossover forms per chromosome arm [9, 10]. The  
89 tight regulation of crossover number is controlled by multiple processes, including crossover  
90 interference, the centromere effect, and region-specific constraints [reviewed in 11]. Once a  
91 crossover has formed, crossover interference functions to suppress the formation of additional  
92 crossovers nearby. Similarly, the centromere effect and regional constraints function to prevent  
93 the formation of crossovers in or next to specific chromatin states, such as the centromere and  
94 heterochromatin. All of these processes function over megabases of DNA to constrain the  
95 crossover number in each meiosis to an average of six crossovers across the three crossover-  
96 competent chromosomes in *Drosophila*. Exactly how interference, the centromere effect, and  
97 region-specific constraints function is not well understood.

98 Double-strand break formation and crossing over in *Drosophila* occur within the context  
99 of full-length synaptonemal complex (SC) (Fig 1A) [15, 16]. The SC, a large protein complex  
100 that assembles between paired homologous chromosomes, is required for the formation of  
101 crossovers. It is therefore possible that the SC may play a role in regulating the crossover fate  
102 of DSBs. Additionally, the SC connects two homologs along their entire lengths, making it an  
103 ideal candidate structure for monitoring DSB formation and crossover maturation occurring at  
104 different places along the chromosomes. Indeed, several studies have strongly suggested the  
105 SC plays a role in mediating crossover interference [17, 18].

106 The synaptonemal complex is arranged in three parts: lateral elements (LEs), a central  
107 region (CR), and a central element (CE) (Fig 1B). The LEs assemble on each homolog  
108 alongside the axis components, which consist of cohesin and cohesin-like proteins that are  
109 thought to establish the meiotic chromatin architecture [reviewed in 19, 20]. The LEs interact

110 with the CR proteins, which occupy the space between the two homologs. Transverse filament  
111 proteins span the distance of the CR, thereby connecting the LEs of each homolog. In the  
112 middle of the CR is the CE, which consists of proteins that are thought to help stabilize the  
113 transverse filaments.

114 Genetic analyses have identified multiple components of the *Drosophila* SC, and recent  
115 advances in superresolution microscopy have allowed SC components to be precisely  
116 positioned within the overall SC structure (Fig 1B). The *Drosophila* SC forms two layers that are  
117 mirror images of one another [21]. C(3)G, the major transverse filament protein of the  
118 *Drosophila* SC [22], forms a homodimer, with the C-terminal ends of each subunit positioned in  
119 the LE and the N-terminal ends in the CE [23]. The N terminus of one homodimer is then  
120 thought to interact with the N terminus of another homodimer to span the distance between the  
121 two homologs, thus connecting the two homologous LEs [23]. It is currently unclear exactly how  
122 C(3)G interacts with the LE. An additional CR protein, Corolla, was recently identified [24].  
123 Corolla, resides within the CR as two parallel tracks and has been shown by yeast two-hybrid  
124 analysis to interact with the CE protein Corona (CONA) [21, 24, 25], which also forms two  
125 parallel tracks within the CE [21, 26]. C(3)G, Corolla, and CONA depend on each other in order  
126 to assemble the SC, and all three proteins are required for the formation of crossovers [22, 24-  
127 26].

128 The first step toward dissecting the functional anatomy of the C(3)G protein involved  
129 creating in-frame deletion mutations, which showed that the N- and C-terminal globular domains  
130 of C(3)G are required to properly assemble the SC and for robust crossover formation [27].  
131 Here, we describe the effects of a mutant,  $c(3)G^{cc\Delta 1}$ , with an in-frame deletion of a coiled-coil  
132 domain. To properly characterize this mutant, we created a CRISPR/Cas9 allele, eliminating  
133 any of the common concerns regarding levels of expression that are inherent when using a

134 randomly inserted transgene. (A transgene in-frame deletion mutant, similar to the one in this  
135 manuscript, has been previously created, but was never extensively analyzed [22]).

136  $c(3)G^{cc\Delta 1}$  removes 211 amino acids from the largest coil-coiled domain of C(3)G which,  
137 as a homozygote, shortens the width of the SC by ~40 nm and thus reduces the distance  
138 between the homologs. Both heterozygotes and homozygotes of  $c(3)G^{cc\Delta 1}$  are able to assemble  
139 the SC, display normal DSB formation, and affect neither the persistence of SC at the  
140 centromere nor centromere clustering. However, euchromatic SC disassembles prematurely in  
141 both genotypes, resulting in fragmented or discontinuous SC along the length of the  
142 chromosomes. This premature SC disassembly affects both homolog pairing and recombination,  
143 but to different degrees on each chromosome.  $c(3)G^{cc\Delta 1}$  is the first Drosophila mutant to  
144 illustrate a chromosome-specific regulation of recombination, where each chromosome has  
145 different requirements for the SC in maintaining homolog pairing and facilitating recombination.

146

## 147 **RESULTS**

### 148 **Novel loss-of-function allele of $c(3)G$ affects the width of the SC**

149 A large deletion in the yeast transverse filament protein Zip1 decreases the distance between  
150 the LEs, suggesting that Zip1 is directly involved in determining the width of the SC [28]. Since  
151 Zip1 and C(3)G are functional homologs of each other, we postulated that a similar deletion in  
152 C(3)G may alter the Drosophila SC in a similar manner to the Zip1 deletion in yeast. To that  
153 end, we created a CRISPR/Cas9-mediated in-frame deletion in the Drosophila  $c(3)G$  gene (see  
154 Methods) that removes 211 amino acids from the second coiled-coil domain in C(3)G (Fig 1B).  
155 We call this mutant  $c(3)G^{cc\Delta 1}$ .

156 Based on the 1.485-angstrom size of an amino acid in a coiled-coil, the mathematically  
157 calculated decrease in SC width expected by deleting 211 amino acids from a coiled-coil  
158 configuration is ~63 nm. However, when using single-molecule superresolution techniques such  
159 as stochastic optical reconstruction microscopy (STORM), which require primary and secondary  
160 antibodies, the size of an antibody complex (20–30 nm) will introduce uncertainty into the  
161 precise positioning of the structure being imaged. To account for this, we added the size of the  
162 primary and secondary antibody complex, which recognizes the C-terminus C(3)G, to the  
163 calculated decrease in SC width resulting in an expected decrease of ~43–53 nm in  $c(3)G^{cc\Delta 1}$   
164 homozygotes.

165 Using STORM on intact germaria with an antibody that recognizes the C-terminal end of  
166 C(3)G, we observed two tracks of the C(3)G C-termini, suggesting that the SC was able to  
167 assemble both C(3)G homodimers (Fig 2). Additionally, when we measured the distance  
168 between these two tracks, referred to as the SC width, it was decreased by ~40 nm in  $c(3)G^{cc\Delta 1}$   
169 homozygotes (Fig 2; wild type, 119 nm  $\pm$  SE 1.0;  $c(3)G^{cc\Delta 1}$ , 78.6 nm  $\pm$  SE 0.3;  $P < 0.0001$ ), which  
170 closely matched the expected decrease in SC width. This suggests that, like Zip1, C(3)G is  
171 responsible for determining the distance between the LEs in Drosophila.

172 STORM analysis of  $c(3)G^{cc\Delta 1}$  heterozygotes, in which flies express one  $c(3)G^{cc\Delta 1}$  version  
173 and one wild type (WT) version of C(3)G, showed an intermediate change in SC width (Fig 2;  
174 107 nm  $\pm$  SE 0.4;  $P < 0.0001$  when compared to WT). This suggests that  $c(3)G^{cc\Delta 1}$  heterozygotes  
175 incorporate a combination of  $c(3)G^{cc\Delta 1}$  and WT versions of C(3)G into the SC. One possible way  
176 to accomplish this heterogeneity would be to alternate the C(3)G tetramers such that every  
177 other tetramer is the  $c(3)G^{cc\Delta 1}$  mutant. In this case, we would expect the profiles on either C-  
178 terminal side of C(3)G to be thicker. However, this is not likely to be the case because the  
179 thicknesses of the C-terminal C(3)G signal are nearly the same for the  $c(3)G^{cc\Delta 1}$  heterozygotes  
180 and homozygotes (WT: 62 nm;  $c(3)G^{cc\Delta 1}$  heterozygote: 49 nm;  $c(3)G^{cc\Delta 1}$  homozygotes: 43 nm).



181 It is also possible that  $c(3)G^{cc\Delta 1}$  and WT C(3)G monomers are able to dimerize and create mixed  
182 C(3)G homodimers, or that the N termini of  $c(3)G^{cc\Delta 1}$  homodimers can interact with the N termini  
183 of WT homodimers in the CE of the SC to create a mixed tetramer. Both possibilities would  
184 result in the intermediate SC width seen in  $c(3)G^{cc\Delta 1}$  heterozygotes. Given the heterogeneous  
185 nature of STORM data, it is impossible to distinguish between these possibilities. Further  
186 studies with alternative methodologies will be needed to gain a more detailed understanding of  
187 this ultrastructure.

188 Both  $c(3)G^{cc\Delta 1}$  heterozygotes and homozygotes initiate SC assembly at the centromeres  
189 during the pre-meiotic mitotic divisions (region 1) and at the onset of meiosis in zygotene/early  
190 pachytene (region 2A) assembled ribbon-like SC with normal kinetics (Fig 3). Moreover, further  
191 analysis of the SC in region 2A by measuring the intensity of the antibody staining of Corolla  
192 between the mutants and WT showed that although the SC appeared to be ribbon-like in the  
193 mutants the intensity was decreased compared to WT (Fig S1). This suggested either that both  
194  $c(3)G^{cc\Delta 1}$  heterozygotes and homozygotes may not be assembling as much SC as in WT or that  
195 both mutants have altered the tripartite structure of the SC. However, based on our ability to  
196 resolve two C(3)G C-terminal tracks in the STORM data and on Corolla being able to assemble  
197 into ribbon-like SC in the deconvolution microscopy data (Fig 3, Figure S1), we do not believe  
198 that the decrease in SC intensity indicates a lack of tripartite SC. All of the known components  
199 of the SC in *Drosophila* are co-dependent on each other to be able to assemble, thus if the  
200 structure of the SC was failing in these mutants then we would expect both C(3)G and Corolla to  
201 be unable to assemble into ribbon-like SC [24, 25].

202

203  **$c(3)G^{cc\Delta 1}$  affects the persistence of SC along the chromosome arms but not at the**  
204 **centromere**

205 Previous studies have shown that *c(3)G* null mutants initiate DSBs, but at reduced levels  
206 compared to WT [16, 29]. This suggests that some DSBs will only form in the presence of SC.  
207 In *c(3)G<sup>ccΔ1</sup>* heterozygotes and homozygotes, DSB formation appears to be normal. To identify  
208 DSBs, we used an antibody that recognizes the phosphorylated form of the histone variant  
209 H2AV (referred to as  $\gamma$ H2AV), and this phosphorylation mark is one of the first events that  
210 occurs following the formation of DSBs [30]. At zygotene/early pachytene (region 2A) all 16-cells  
211 within the cyst will induce DSBs, and for this assay we scored only DSBs in the meiotic cells,  
212 were identified by the presence of the SC [16]. Nurse cells also induce DSBs, but they do not  
213 assemble the SC and were excluded from this analysis [16].

214 In an otherwise WT background, both *c(3)G<sup>ccΔ1</sup>* heterozygotes and homozygotes  
215 displayed near WT levels of  $\gamma$ H2AV foci in zygotene/early pachytene (region 2A) (Fig S2; WT=  
216 average  $6 \pm \text{SE } 0.6$ ; *c(3)G<sup>ccΔ1</sup>* homozygotes= average  $6 \pm \text{SE } 0.6$ ,  $P=0.77$ ; *c(3)G<sup>ccΔ1</sup>*  
217 heterozygotes= average  $7 \pm \text{SE } 0.8$ ,  $P=0.69$ ). By early pachytene (region 2B), the number of  
218  $\gamma$ H2AV foci was reduced to  $\sim 1$  focus in WT (average  $1 \pm \text{SE } 0.3$ ) and *c(3)G<sup>ccΔ1</sup>* heterozygotes  
219 (average  $1 \pm \text{SE } 0.2$ ,  $P=0.06$ ). *c(3)G<sup>ccΔ1</sup>* homozygotes displayed a wider range of  $\gamma$ H2AV foci  
220 with an average of 3 DSBs ( $\pm \text{SE } 0.5$ ) in early pachytene (region 2B). This was statistically  
221 different from WT ( $P=0.036$ ), but it is unclear if this indicates a delay in DSB repair or the  
222 initiation of more DSBs. By mid pachytene (region 3) all  $\gamma$ H2AV foci were absent in both  
223 *c(3)G<sup>ccΔ1</sup>* homozygotes ( $P=0.54$ ) and heterozygotes ( $P=0.17$ ). Thus, while *c(3)G<sup>ccΔ1</sup>*  
224 homozygotes may have some anomalies in DSB repair or late-DSB initiation in early pachytene,  
225 by mid pachytene the repair of these breaks follows similar to WT timing.

226 In WT, euchromatic SC initiates disassembly in mid/late pachytene (stages 5–7) and the  
227 SC is fully disassembled from the chromosome arms by stages 8–9. Interestingly, both *c(3)G<sup>ccΔ1</sup>*  
228 homozygotes and heterozygotes initiated premature disassembly of euchromatic SC as cells  
229 progressed into early and mid pachytene (Fig 3). *c(3)G<sup>ccΔ1</sup>* homozygotes began to initiate

230 euchromatic SC disassembly in early pachytene (region 2B), whereas  $c(3)G^{cc\Delta 1}$  heterozygotes  
231 started disassembling euchromatic SC in mid pachytene (region 3). Furthermore, this pattern  
232 was recapitulated when the antibody intensity of Corolla was quantified in each mutant at each  
233 stage of meiosis (Fig S1). Thus, the presence of one WT copy of C(3)G in a  $c(3)G^{cc\Delta 1}$   
234 heterozygote delays the onset of premature SC disassembly but cannot fully rescue the defect,  
235 demonstrating the semi-dominant nature of the  $c(3)G^{cc\Delta 1}$  mutant. In both homozygotes and  
236 heterozygotes, the fragmented SC persisted until stages 5–7 (mid/late pachytene) and was fully  
237 disassembled by stages 8–9, similar to when euchromatic SC is normally disassembled from  
238 the chromosome arms (Fig 3; Fig S1). Surprisingly,  $c(3)G^{cc\Delta 1}$  mutants were able to maintain SC  
239 at the centromeres, suggesting that the SC at the centromere is unaffected by this deletion.

240 In *Drosophila*, centromeres begin to homologously pair and initiate the assembly of  
241 centromeric SC during the four premeiotic mitotic divisions (region 1) (Fig 1A, Fig 3)[13]. At the  
242 transition from the premeiotic divisions to meiotic prophase (region 2A) the paired centromeres  
243 cluster together into 1–3 masses, and this process is dependent on SC assembly [12, 14]. Since  
244  $c(3)G^{cc\Delta 1}$  homozygotes and heterozygotes were able to maintain the SC at the centromeres with  
245 WT kinetics, we assayed centromere clustering to determine if this SC was functional. To do  
246 this, we counted the number of centromere foci in nuclei containing SC using the centromeric  
247 nucleosome Centromere identifier (CID) as a marker for the centromeres. In all of the stages  
248 analyzed, centromere clustering was unaffected by the presence of  $c(3)G^{cc\Delta 1}$  (Fig S3, Table  
249 S1). Also,  $c(3)G^{cc\Delta 1}$  did not display a dominant effect on centromere clustering when assayed as  
250 a heterozygote (Fig S3, Table S1). For  $c(3)G^{cc\Delta 1}$  homozygotes, we do observe an increase in  
251 the number of nuclei with 3 centromeric foci in early pachytene. However, in the  $c(3)G^{68}$  null  
252 mutant, most of the nuclei have 4 or more CID foci at this stage, which does not occur in the  
253  $c(3)G^{cc\Delta 1}$  mutants [14]. Thus, these data demonstrate that centromeric SC is not dependent on  
254 the deleted amino acids in  $c(3)G^{cc\Delta 1}$  to function in clustering centromeres.

255 ***c(3)G<sup>ccΔ1</sup>* causes defects in both recombination and euchromatic pairing on the X**  
256 **chromosome**

257 Previous studies have shown that in most (but not all) organisms the SC is required for the  
258 formation of crossovers [reviewed in 19, 31]. In *Drosophila*, Gowen showed that flies  
259 heterozygous for the *c(3)G* null mutation are indistinguishable from WT with respect to  
260 recombination on all three crossover-competent chromosomes, demonstrating that one copy of  
261 *C(3)G* is sufficient for normal recombination [32]. Moreover, flies homozygous for the *c(3)G* null  
262 mutation are completely unable to repair DSBs into either crossovers or noncrossover gene  
263 conversions on all three crossover competent chromosomes [16, 22, 32-34]. Therefore, the  
264 question of how these breaks are repaired remains open [34].

265 Unlike *c(3)G* null mutants, *c(3)G<sup>ccΔ1</sup>* does initially assemble ribbon-like SC, which  
266 prematurely disassembles into fragments as the cells progress through early to mid pachytene.  
267 To determine if the SC assembled in *c(3)G<sup>ccΔ1</sup>*-bearing oocytes is able to promote crossing over,  
268 we assayed for the presence of crossovers in both *c(3)G<sup>ccΔ1</sup>* homozygotes and heterozygotes.  
269 Interestingly, *c(3)G<sup>ccΔ1</sup>* homozygotes and heterozygotes displayed different phenotypes with  
270 regard to recombination on the X chromosome (Fig 4A; Table 1). Both genotypes were able to  
271 form at least some crossovers, suggesting that the region deleted in *c(3)G<sup>ccΔ1</sup>* is not required to  
272 promote crossover formation per se. However, the crossovers made in *c(3)G<sup>ccΔ1</sup>* heterozygotes  
273 displayed an altered distribution along the length of the X chromosome, while *c(3)G<sup>ccΔ1</sup>*  
274 homozygotes severely reduced the frequency of crossing over on the X.

275 In WT, the majority of crossovers are known to occur in the middle one-third of the  
276 chromosome arms and are inhibited near the centromeres and telomeres. Indeed, in the WT  
277 control for our X chromosome recombination assay, most of the crossovers occurred between  
278 the markers *vermillion* (*v*) and *forked* (*f*), which reside in the medial one-third of the X

279 chromosome (Fig 4A; Table 1 and S2). However, in  $c(3)G^{cc\Delta 1}$  heterozygotes, the crossover  
280 distribution was shifted toward the centromere-proximal region of the chromosome, such that  
281 most crossovers occurred between the *forked* and *yellow*<sup>+</sup> ( $y^+$ ) markers that encompass the  
282 centromere. This crossover distribution shift resulted in a corresponding decrease in crossovers  
283 in the distal chromosome regions, between the markers *scute* (*sc*) and *crossveinless* (*cv*). Also,  
284 the overall map length of the X chromosome was slightly decreased in  $c(3)G^{cc\Delta 1}$  heterozygotes  
285 (51.2 cM in  $c(3)G^{cc\Delta 1}$  heterozygotes vs. 63 cM in WT; Table 1). Thus,  $c(3)G^{cc\Delta 1}$  heterozygotes  
286 appear to alter the distribution of crossovers, without greatly changing the total number of  
287 crossovers on the X.

288 In contrast,  $c(3)G^{cc\Delta 1}$  homozygotes severely reduced crossing over on the X  
289 chromosome (Fig 4A; Table 1). The total map length of the X chromosome decreased by more  
290 than 80%, to 11.8 cM from 63.0 cM in WT, with the majority of the reduction in the medial and  
291 distal intervals. However, even with this reduction the distribution of crossovers seems to  
292 display the same centromere-proximal shift as in  $c(3)G^{cc\Delta 1}$  heterozygotes.

293 A more comprehensive approach for understanding these reductions in exchange lies in  
294 the application of Weinstein's method to calculate the frequency of bivalents that underwent  
295 zero ( $E_0$ ), one ( $E_1$ ), or two ( $E_2$ ) crossover events [36]. This method accounts for the fact that a  
296 single recombination event between two homologs will produce two single crossover and two  
297 noncrossover chromatids (only one of which is recovered) and that a double crossover event  
298 (depending on whether it is a two-strand, a three-strand, or a four-strand double) will produce  
299 some combination of noncrossover, single crossover, or double crossover chromatids (again,  
300 only one of which is recovered). In WT, the frequency of noncrossover bivalents (or  $E_0$   
301 bivalents) was 18.9%, while in  $c(3)G^{cc\Delta 1}$  homozygotes it was 79.2%—a four-fold increase in the  
302 frequency of an oocyte receiving a noncrossover bivalent (Table 1). The remaining ~20% of X  
303 chromosomal bivalents in  $c(3)G^{cc\Delta 1}$  homozygotes did undergo a single crossover event, creating

304 single crossover (or  $E_1$ ) bivalents and the vast majority of these single crossovers occurred in  
305 centromere-proximal intervals (Fig 4A).

306 The presence of SC between homologous chromosomes is thought to keep them paired  
307 throughout pachytene, which promotes crossing over between two homologous chromosomes.  
308 Since the SC is prematurely disassembled in  $c(3)G^{cc\Delta 1}$ , it is possible that homologous  
309 chromosome pairing may be lost before crossovers can be established, which may explain the  
310 altered crossover distribution. We analyzed homolog pairing using euchromatic FISH probes at  
311 distal (3C3–3C7) and proximal (15C1–15D6) regions on the X chromosome (Fig 4B; Table S2  
312 and S3). A locus was considered paired if the distance between the two FISH probe foci was  
313 less than 0.75  $\mu\text{m}$  and unpaired if foci exhibited a distance 0.75  $\mu\text{m}$  or greater.

314 In  $c(3)G^{cc\Delta 1}$  heterozygotes, both distal and proximal probes were paired in nearly 100%  
315 of the oocytes in zygotene/early pachytene (region 2A) (Fig 4B, Table S3). However, the distal  
316 probe was progressively less paired as the cells progressed to early pachytene (region 2B) and  
317 mid pachytene (region 3). The proximal probe remained nearly 100% paired throughout these  
318 regions. Thus, the centromere-proximal shift in recombination was correlated with a loss of  
319 distal euchromatic pairing and a maintenance of proximal euchromatic pairing on the X  
320 chromosome in  $c(3)G^{cc\Delta 1}$  heterozygotes.

321 Unlike  $c(3)G^{cc\Delta 1}$  heterozygotes,  $c(3)G^{cc\Delta 1}$  homozygotes displayed a progressive loss of  
322 euchromatic pairing at both proximal and distal loci on the X chromosome, suggesting that the X  
323 chromosomes may be unpaired by mid pachytene (Fig 4B, Table S3). Based on our FISH  
324 assay, the proximal locus was able to maintain pairing more effectively than the locus detected  
325 by the distal probe, which may explain why the few crossovers observed in  $c(3)G^{cc\Delta 1}$   
326 homozygotes occur in the centromere proximal region of the X chromosome. Indeed, we  
327 propose that the loss of homolog pairing caused by a progressive loss of X chromosome SC is

328 the reason for the significant decrease in  $X$  recombination observed in  $c(3)G^{cc\Delta 1}$  homozygotes. If  
329 we are correct in this assertion, then the observation that homolog pairing is not drastically  
330 reduced in  $c(3)G^{cc\Delta 1}$  homozygotes until early pachytene (region 2B) suggests that crossover  
331 designation on at least the  $X$  chromosome may be occurring either multiple times throughout  
332 pachytene or later in pachytene than was previously thought.

### 333 **Autosomal crossover distribution is shifted to centromere-proximal regions**

334 Meiotic mutants that decrease recombination on the  $X$  chromosome also display similar  
335 decreases in recombination on the autosomes [22, 27, 29, 37, 38]. It was therefore surprising  
336 that both  $c(3)G^{cc\Delta 1}$  homozygotes and heterozygotes displayed robust recombination on the  
337 autosomes with the map lengths of each autosome increasing by more than 10 map units,  
338 suggesting that each chromosome received more crossovers than normally would occur in WT  
339 (Fig 4C,E; Tables 2 and 3). Indeed, to our knowledge,  $c(3)G^{cc\Delta 1}$  is the first mutant in *Drosophila*  
340 to exhibit such dramatic differences in terms of its effects on recombination on the  $X$   
341 chromosome compared to the autosomes. Moreover, the biological significance of finding that  
342 the  $X$  chromosome may be more sensitive to  $c(3)G^{cc\Delta 1}$ -induced changes in the SC than the  
343 autosomes may be that the various chromosome arms differ in their requirements for proper SC  
344 structure and function.

345 Although overall recombination on the autosomes was robust, the crossover distribution  
346 was shifted to the centromere-proximal regions in both  $c(3)G^{cc\Delta 1}$  homozygotes and  
347 heterozygotes. On the 3<sup>rd</sup> chromosome, we observed a slight decrease in recombination in the  
348 distal interval [*roughoid-hairy* (*ru-h*)] of both homozygotes and heterozygotes (Fig 4E; Table 3),  
349 while on the 2<sup>nd</sup> chromosome, only  $c(3)G^{cc\Delta 1}$  homozygotes displayed a decrease in the distal  
350 interval *net-decapentaplegic* (*net-dpp*) (Fig 4C; Table 2).

351           However, the most striking effects of the  $c(3)G^{cc\Delta 1}$  mutants on autosomal crossover  
352 distribution can be seen by considering the intervals that span their centromeres (Fig 4C,E;  
353 Tables 2, 3 and S2). On the 2<sup>nd</sup> chromosome, exchange in the pericentromeric *purple* to  
354 *cinnabar* (*pr-cn*) interval increased more than three fold in both heterozygotes and  
355 homozygotes when compared to WT. Moreover, on the 3<sup>rd</sup> chromosome, both  $c(3)G^{cc\Delta 1}$   
356 heterozygotes and homozygotes also showed a greater than 300% increase in recombination  
357 frequency for the centromere spanning interval *scarlet* to *curled* (*st-cu*). Indeed, for the 3<sup>rd</sup>  
358 chromosome more than one third of the crossover events occurred in the pericentromeric *st-cu*  
359 interval (as compared to 12% in wild type). Thus, both autosomes displayed a substantial  
360 increase in pericentromeric recombination frequency compared to WT, suggesting that the  
361  $c(3)G^{cc\Delta 1}$  mutation may alleviate constraints that mediate recombination in such intervals, such  
362 as centromere effect, which normally functions to restrict recombination in these intervals.

363           Since the X chromosome displayed both a centromere-proximal shift in recombination  
364 and a premature loss in homolog pairing, we wondered if the discontinuous SC in  $c(3)G^{cc\Delta 1}$  was  
365 affecting homolog pairing on the autosomes in a similar manner. In  $c(3)G^{cc\Delta 1}$  homozygotes,  
366 these decreases in recombination were paralleled by progressive decreases in euchromatic  
367 pairing for the distal probe on each autosome (Fig 4C–F; Tables 2, 3 and S3). Both the proximal  
368 and medial probes remained relatively well paired on the autosomes throughout zygotene to  
369 mid pachytene (region 2A to region 3) in  $c(3)G^{cc\Delta 1}$  homozygotes.

370            $c(3)G^{cc\Delta 1}$  heterozygotes were able to maintain chromosome pairing along the entire  
371 length of both the 2<sup>nd</sup> and 3<sup>rd</sup> chromosomes throughout zygotene to mid pachytene (region 2A to  
372 region 3) (Fig 4D,F; Table S3). Because both  $c(3)G^{cc\Delta 1}$  homozygotes and heterozygotes  
373 displayed the same altered crossover distribution, but only  $c(3)G^{cc\Delta 1}$  homozygotes lost pairing in  
374 the distal chromosomal regions, the loss of homolog pairing in the distal regions of the  
375 autosomes is likely not the cause of the centromere-proximal shift in crossing over. Rather, our



376 observations in  $c(3)G^{cc\Delta 1}$  heterozygotes suggest that discontinuity of the SC may cause the shift  
377 in crossover distribution. It is possible that because centromeric SC appears to be unaffected by  
378 the  $c(3)G^{cc\Delta 1}$  mutation, the SC near the centromeric heterochromatin is more stable, thus  
379 making it more suitable for crossovers.

380

### 381 **$c(3)G^{cc\Delta 1}$ homozygotes and heterozygotes exhibit greatly reduced crossover interference**

382 It is known that intact SC is required for crossover interference, which acts to regulate the  
383 number of crossovers formed on each chromosome arm by inhibiting crossovers from forming  
384 within several megabases of each other [reviewed in 4, 31]. In other organisms, mutants that  
385 display fragmented SC and/or chromosome axes have defects in crossover interference that  
386 result in an increase in the number of crossovers [reviewed in 4]. On the *X* chromosome neither  
387  $c(3)G^{cc\Delta 1}$  homozygotes nor heterozygotes displayed an increase in crossing over, in fact  
388  $c(3)G^{cc\Delta 1}$  homozygotes caused a severe reduction in crossing over (Fig 4A). Thus, it is not  
389 surprising that crossover interference is unaffected on the *X* chromosome in either  $c(3)G^{cc\Delta 1}$   
390 homozygotes or heterozygotes; but rather the observed loss of recombination is the result of a  
391 loss of homolog pairing and/or synapsis (Table 1).

392 However, unlike the *X* chromosome, the autosomes displayed an increase in the  
393 frequency of crossing over in  $c(3)G^{cc\Delta 1}$  homozygotes and heterozygotes suggesting that  
394 crossover interference may be affected (Fig 4C,E). Indeed, crossover interference is reduced in  
395  $c(3)G^{cc\Delta 1}$  mutants on chromosome 2.  $c(3)G^{cc\Delta 1}$  heterozygotes have a complete or near complete  
396 loss of crossover interference across the entire chromosome (Table 2). This decrease in  
397 interference allows for an increase in the occurrence of double and triple crossovers (Table 2)  
398 and results in an increase in map length [WT = 52.2 cM;  $c(3)G^{cc\Delta 1}$  homozygotes = 67.6 cM;

399  $c(3)G^{cc\Delta 1}$  heterozygotes = 72.8 cM]. It is possible that the decreased interference on the 2<sup>nd</sup>  
400 chromosome results from the fragmented SC observed in the  $c(3)G^{cc\Delta 1}$  mutants.

401 On chromosome 3,  $c(3)G^{cc\Delta 1}$  homozygotes displayed levels of crossover interference  
402 similar to WT in the distal regions of the chromosomes (Table 3). However, in the centromere-  
403 proximal regions [*thread/scarlet/curled (th/st/cu)*], the effect of interference seemed to get  
404 significantly weaker (WT = -4.5;  $c(3)G^{cc\Delta 1}$  homozygotes = -12.6). While we did not expect to  
405 observe positive crossover interference across the centromere due to the centromere effect and  
406 other potential factors functioning to suppress crossing over in this region, the large increase in  
407 negative crossover interference was unexpected. Furthermore, this increase in negative  
408 crossover interference may explain the observed increase in map length for  $c(3)G^{cc\Delta 1}$   
409 homozygotes on chromosome 3 (WT = 50.9 cM;  $c(3)G^{cc\Delta 1}$  homozygotes = 59.6 cM). Curiously,  
410  $c(3)G^{cc\Delta 1}$  heterozygotes displayed near-WT levels of crossover interference across all the  
411 intervals assayed on chromosome 3 (Table 3). Thus, the observed increase in map length in  
412  $c(3)G^{cc\Delta 1}$  heterozygotes cannot be explained by a loss in crossover interference (WT = 50.9 cM;  
413  $c(3)G^{cc\Delta 1}$  heterozygotes = 63.8 cM).

#### 414 **Chromosome segregation is unaffected by the $c(3)G^{cc\Delta 1}$ mutation**

415 It is well known that a decrease in recombination on the X chromosome should result in an  
416 increase in frequency of X chromosome nondisjunction, such that the frequency of X  
417 chromosome nondisjunction is equal to the frequency of  $E_0$  cubed [39]. This reflects the  
418 requirement for a pair of nonexchange autosomes to mediate missegregation of nonexchange X  
419 chromosomes [40, 41]. Curiously, we did not observe this expected increase in the frequency of  
420 X nondisjunction in  $c(3)G^{cc\Delta 1}$  homozygotes (Table S4).

421 Moreover, mutants that decrease recombination on the X chromosome and increase the  
422 frequency of X chromosome nondisjunction typically also decrease recombination on the

423 autosomes [37, 38]. However,  $c(3)G^{cc\Delta 1}$  homozygotes showed robust recombination on the  
424 autosomes (Fig 4). Previous studies have shown that the distributive system, which normally  
425 functions to segregate the obligately achiasmate 4<sup>th</sup> chromosomes, can accurately segregate  
426 two achiasmate chromosomes, such as the  $X$  and 4<sup>th</sup> chromosomes [41]. Therefore, in  $c(3)G^{cc\Delta 1}$   
427 homozygotes, it is likely that the lack of nondisjunction is due to the distributive system's ability  
428 to accurately segregate the two achiasmate  $X$  and 4<sup>th</sup> chromosomes. The mechanism of how  
429 the distributive system accomplishes accurate segregation without a crossover is unclear, thus  
430 future studies are needed to elucidate this mechanism.

431

## 432 **DISCUSSION**

433 Although our understanding of SC structure has been greatly facilitated by advancements in  
434 superresolution microscopy, which have revealed a more precise three-dimensional model of  
435 SC ultrastructure, there is still much to learn about SC function. The multiple roles the SC plays  
436 during meiotic prophase illustrate the functional importance of this protein complex in ensuring  
437 the successful transmission of genetic information from one generation to the next. However,  
438 because the SC is integral for the proper execution of so many meiotic processes, it has been  
439 difficult to elucidate which SC proteins or protein domains are required for which functions.  
440 Here, we show that a deletion in the large coiled-coil domain of C(3)G reveals two different  
441 requirements for the SC: first, the deleted coiled-coil region in  $c(3)G^{cc\Delta 1}$  is required to maintain  
442 both SC structure along the chromosome arms and homolog pairing during meiotic prophase;  
443 and second, the SC's ability to facilitate recombination depends upon its full-length assembly. In  
444 addition, each chromosome appears to respond differently, on both local and global levels, to  
445 structural changes in the SC.

## 446 **Centromeric SC versus euchromatic SC**

447 The difference between the kinetics of SC assembly and disassembly along the chromosome  
448 arms versus at the centromeres suggests that the SC at the centromeres might be structurally  
449 different than the SC along the chromosome arms. Indeed, it is known that the SC at the  
450 centromeres requires certain proteins that euchromatic SC does not. For example, the cohesion  
451 complex proteins ORD, SUNN, and SOLO are required for assembly of centromeric SC but not  
452 the assembly of euchromatic SC [42-45], while euchromatic—but not centromeric—SC requires  
453 the LE protein C(2)M to completely synapse homologs [12]. We now show in  $c(3)G^{cc\Delta 1}$  mutants  
454 that a large region of the major coiled-coil domain in C(3)G is also dispensable for both  
455 centromeric SC assembly and centromere clustering.

456 This difference between the SC at the euchromatin and at the centromere is not unique  
457 to *Drosophila*. In yeast, the transverse filament protein Zip1 also persists long after the SC along  
458 the chromosome arms has disassembled, and it is necessary for accurate achiasmate  
459 chromosome segregation [46, 47]. Similarly, mice spermatocytes retain CR components of the  
460 SC at the centromeres long after the SC has disassembled from the chromosome arms [48]. In  
461 both mice and *Drosophila*, it is unclear why the SC persists at the centromeres, but it is possible  
462 that centromeric SC in these organisms may function in achiasmate chromosome segregation,  
463 as it does in yeast. Although errors in *Drosophila* female meiosis and mice spermatocytes are  
464 rare, they do occur. Thus, persistence of centromeric SC may act as a backup segregation  
465 mechanism to ensure proper chromosome segregation when a rare error does occur.

#### 466 **Chromosome-specific regulation of recombination**

467 All previously characterized mutants in *Drosophila* that affect recombination on the X  
468 chromosome show a similar, if not identical, effect on the autosomes. Prior to  $c(3)G^{cc\Delta 1}$ , all  
469 known SC mutants abolished or severely reduced recombination on all three crossover  
470 chromosomes [22, 24, 25, 27].  $c(3)G^{cc\Delta 1}$  is unique when compared to other SC mutants

471 because it differentially affects recombination on each chromosome, which suggests that each  
472 chromosome has different rules for positioning crossovers along each chromosome arm [9].

473 While subtler than the differences observed between the X chromosome and the  
474 autosomes, the differences between the two autosomes in  $c(3)G^{cc\Delta 1}$  was indeed surprising.  
475 Similar differences have been observed before. Miller et al. found that chromosome 2 displayed  
476 a stronger effect of crossover interference than chromosome 3 [9]. They noticed that the 2<sup>nd</sup>  
477 chromosome rarely had double crossovers (out of 100 flies, only 14 double crossovers were  
478 detected) and the double crossovers were positioned on average 11.5 Mb apart [9]. Meanwhile,  
479 the 3<sup>rd</sup> chromosome exhibited nearly twice as many double crossovers as the 2<sup>nd</sup> chromosome  
480 (out of 100 flies, 27 double crossovers were detected), and the double crossovers were  
481 positioned on average 11.0 Mb apart [9, 49].

482 In  $c(3)G^{cc\Delta 1}$  homozygotes and heterozygotes, both of the autosomes display defects in  
483 crossover interference that result in an increase in the number of crossovers, but the 2<sup>nd</sup>  
484 chromosome seems to display a stronger effect. Perhaps this result is best interpreted in the  
485 context of Miller et al.'s characterization of double crossovers on the two autosomes [9].  
486 Because the 2<sup>nd</sup> chromosome relies heavily on crossover interference to regulate crossing over,  
487 a loss of crossover interference, like that observed in  $c(3)G^{cc\Delta 1}$  homozygotes and  
488 heterozygotes, would cause a large increase in the number of crossovers. Perhaps, then, the 3<sup>rd</sup>  
489 chromosome places more emphasis on an alternative mechanism, such as the centromere  
490 effect, to regulate crossing over instead of crossover interference. This may explain why the  
491 autosomes display subtle differences in recombination when crossover interference is  
492 diminished to a similar degree in  $c(3)G^{cc\Delta 1}$  homozygotes and heterozygotes.

493 Additionally,  $c(3)G^{cc\Delta 1}$  demonstrates the importance of assaying multiple chromosomes  
494 when mutants are defective in recombination. Although numerous previous characterizations of

495 recombination-defective mutants in *Drosophila* have only measured recombination on one  
496 chromosome [16, 22, 24], our data from the  $c(3)G^{cc\Delta 1}$  homozygotes illustrate how misleading it  
497 can be to assay only one chromosome. In this case, the *X* chromosome is more sensitive to the  
498  $c(3)G^{cc\Delta 1}$  mutation than are the autosomes. Differences between the sex chromosomes and the  
499 autosomes are not specific to *Drosophila*. For example, studies in *Caenorhabditis elegans* found  
500 that the *X* chromosome initiated meiotic DNA replication later than the autosomes [50, 51].  
501 While the *X* chromosome and the autosomes seemed to homologously pair during the same  
502 small window of time in *C. elegans*, complete synapsis of the *X* chromosome was delayed  
503 and/or slower than the autosomes [50]. Currently, it is unknown in *Drosophila* if *X* chromosome  
504 synapsis is delayed, but our data support a view that initiating a synapsis delay of the *X*  
505 chromosome may result in a later initiation of recombination on the *X* chromosome.

506 Multiple factors work in concert to regulate recombination, and the SC appears to play a  
507 vital role in this regulation. The SC is required for crossovers in all organisms that assemble the  
508 structure, and  $c(3)G^{cc\Delta 1}$  has demonstrated an additional role of the *Drosophila* SC in regulating  
509 the positions of crossovers. Future studies are needed to determine the mechanism of how  
510 *C(3)G* and the SC regulate recombination. Additionally,  $c(3)G^{cc\Delta 1}$  is a large deletion mutant, thus  
511 future experiments dissecting this deletion may reveal insights into this mechanism.

512

## 513 MATERIALS AND METHODS

514 Further information and requests for resources and reagents should be directed to and will be  
515 fulfilled by the Lead Contact, R. Scott Hawley (RSH@stowers.org).

### 516 Experimental model and subject details

517 The *Drosophila* stocks used in the foregoing assays were kept at a humidity-controlled 25°C  
518 and on standard food. All mention of “wild type” (WT) refers to the genotype: *y w; +/+; +/+; sv<sup>spa-</sup>*  
519 *pol*, unless stated otherwise. The key resource table contains a list of all the fly stocks used in  
520 this manuscript.

#### 521 *CRISPR/Cas9 generation of the c(3)G<sup>ccΔ1</sup> deletion flies*

522 To aid in screening for *c(3)G<sup>ccΔ1</sup>* mutant flies, we incorporated a piggy BAC transposon carrying  
523 a 3xP3-DsRed that expresses in the fly eye into the intron directly downstream of the *c(3)G<sup>ccΔ1</sup>*  
524 deletion [intron 5 of *c(3)G*] in the homologous repair template plasmid. The piggy BAC  
525 transposon plasmid was constructed to have flanking AarI and SapI restriction sites (Addgene  
526 51434). We used PCR to obtain two fragments of *c(3)G* from the *Drosophila* genome that  
527 flanked the position where the piggy BAC would be inserted and added in either an AarI or SapI  
528 restriction site. The ~2600-bp fragment upstream of the piggy BAC insertion site contained AarI  
529 sites and was obtained using these primers: Forward,  
530 tataCACCTGCattaCCGAcgctagtggctcctagagttcag; Reverse,  
531 gcagCACCTGCgcgGTTAAatgaaaaagaattataagtctaccattaggtatc. The ~1000-bp fragment  
532 downstream of the piggy BAC insertion site contained SapI sites and was obtained using these  
533 primers: Forward, gccgGCTCTTCNTAAcctttttctacaaaatgattatt; Reverse,  
534 gtatGCTCTTCNCGGtcatcaaaacatagtttagtatcg.

535 To insert these fragments into the piggy BAC plasmid, the plasmid and the downstream  
536 SapI-containing PCR was digested with SapI (also called LgI from ThermoFisher ER1931),  
537 phosphatase treated (Antarctic phosphatase, NEB M0289S), and ligated together using T4  
538 ligase (NEB M0202S). The upstream AarI-containing PCR fragment was TOPO cloned using  
539 the Zero Blunt TOPO kit (ThermoFisher 451245). Then, TOPO AarI plasmid was cut using the  
540 restriction enzyme HindIII (NEB R0104S), which removes a 708-bp fragment from *c(3)G*. The

541 cut TOPO AarI plasmid was then phosphatase treated and ligated back together to create the  
542  $c(3)G^{cc\Delta 1}$  deletion. Then, this plasmid was digested with AarI (ThermoFisher ER1581) to  
543 generate a ~1900-bp fragment containing the  $c(3)G^{cc\Delta 1}$  deletion, which was cloned into the  
544 piggy BAC plasmid containing the downstream Sapl  $c(3)G$  fragment.

545 A CRISPR target sequence was selected from the flyCRISPR Optimal Target Finder  
546 (<http://tools.flycrispr.molbio.wisc.edu/targetFinder/>). Only a single site upstream of the  $c(3)G^{cc\Delta 1}$   
547 deletion was selected (AAAGCTTTGTTGGCCTGTATTGG) and constructed into the pU6-BbsI-  
548 chiRNA guide RNA (gRNA) plasmid (Addgene 45946). Sense  
549 (CTTCGAAAGCTTTGTTGGCCTCTAT) and antisense (AACATAGAGGCCAACAAAGCTTTC)  
550 oligonucleotides were ordered from IDT and cloned into the gRNA plasmid as described by the  
551 flyCRISPR subcloning pU6-gRNA protocol (<http://flycrispr.molbio.wisc.edu/protocols/gRNA>).  
552 Three single nucleotide polymorphisms (SNPs) were made in the CRISPR target sequence (the  
553 mutated bases are shown in bold: ccaataga**agcga**ataaagcttt) in the  $c(3)G^{cc\Delta 1}$  homologous repair  
554 template plasmid to prevent Cas9 from cutting this plasmid. These SNPs were made using the  
555 Quik Change II XL Site-Directed Mutagenesis Kit (Agilent Technology, 200521) and the reaction  
556 was performed as described in the kit protocol. The gRNA and  $c(3)G^{cc\Delta 1}$  homologous repair  
557 template plasmid were sent to Genetivision (Houston, Texas) for injection into  $y m[VASA-Cas9-$   
558  $3xGFPJZH-2A-3xRFP w^{1118}/FM7c$  flies (BLM 51323). Genetivision injected the gRNA plasmid at  
559 250 ng/ $\mu$ l and the  $c(3)G^{cc\Delta 1}$  homologous repair template at 500 ng/ $\mu$ l.

560  $c(3)G^{cc\Delta 1}$  was isolated by crossing the G0 injected flies to  $y w; Pr/TM3; sv^{spa-pol}$ , then the  
561 F1 progeny were screened for expression of dsRed in the fly eyes. Unfortunately, the genomic  
562 locus marking the VASA-Cas9 transgene is marked with RFP, so only F1 males were screened  
563 for dsRed expression. PCR and Sanger sequencing were used to confirm the  $c(3)G^{cc\Delta 1}$  deletion  
564 and a transposase (BLM 32073) was crossed in to excise the transposon from the gene. Those  
565 flies that successfully excised the transposon were PCR and Sanger sequenced to confirm the



566 absence of the transposon and presence of the  $c(3)G^{cc\Delta 1}$  deletion. Then, the  $c(3)G^{cc\Delta 1}$   
567 chromosome was allowed to freely recombine with a multiply marked third chromosome to  
568 remove any potential off-target mutations caused by removal of the piggy Bac and/or Cas9. Two  
569  $c(3)G^{cc\Delta 1}$  fly stocks were established and used for all the assays in this manuscript: (1) carrying  
570 all the markers from 3L [*roughoid* (*ru*), *hairy* (*h*), *thread* (*th*), *scarlet* (*st*)] and two markers from  
571 3R [*curled* (*cu*), *claret* (*ca*)] in addition to the  $c(3)G^{cc\Delta 1}$  deletion, and (2) only carrying *ca* with the  
572  $c(3)G^{cc\Delta 1}$  deletion.

### 573 **Method details**

#### 574 *Immunohistochemistry for DeltaVision and STORM microscopy*

575 Ovary fixation and immunofluorescence for DeltaVision imaging were performed as detailed in  
576 Lake et al. 2015 [29]. Briefly, ovaries were dissected in PBS with 10% Tween (PBST) for 15 min  
577 and fixed in a 2% formaldehyde solution with heptane [165  $\mu$ l PBS, 10  $\mu$ l nonidet-P40 (Sigma-  
578 Aldrich, 11332473001), 600  $\mu$ l heptane and 25  $\mu$ l of a 16% formaldehyde (Electron Microscopy  
579 Sciences, 15710)] for 20 min. Then, ovaries were washed 3 times for 10 min each with PBST.  
580 For experiments when only the early stages of oogenesis (stages 1–6) were analyzed, the  
581 ovaries were clipped to remove the later stages of oogenesis. However, for the experiments  
582 analyzing stages 7–9, the ovaries were rapidly pipetted to separate out the stages. Next,  
583 ovaries were blocked in PBST+0.1% bovine serum albumin (BSA) for at least 1 hr, the block  
584 was removed, and fresh PBST was added with the primary antibodies and left rocking overnight  
585 at 4°C. Primary antibodies used in this manuscript include mouse anti-C(3)G C-terminus (1A8–  
586 1G2; used at 1:500; [23]), affinity-purified rabbit anti-Corolla (used a 1:2000; [24]), rat anti-CID  
587 (used at 1:3000; from Claudio Sunkel), and mouse anti- $\gamma$ H2AV (used at 1:500; Iowa Hybridoma  
588 Bank, UNC93-5.2.1; [30]). The next day, the primary antibodies were removed and the ovaries  
589 were washed 3 times for 15 min each with PBST. Then, secondary antibodies were added in

590 PBST and incubated for 2 hr, rocking at room temperature. All secondary antibodies were used  
591 at 1:500, and the secondary antibodies used were Alexa Fluor 488 goat anti-mouse  
592 (ThermoFisher, A11001), Alexa Fluor 555 goat anti-mouse (ThermoFisher, A21422), Alexa  
593 Fluor 647 goat anti-mouse (ThermoFisher, A21235), Alexa Fluor 488 goat anti-rabbit  
594 (ThermoFisher, A11008), Alexa Fluor 555 goat anti-rabbit (ThermoFisher, A21428), Alexa Fluor  
595 647 goat anti-rat (ThermoFisher, A21434), and Alexa Fluor 555 goat anti-rat (ThermoFisher,  
596 A21247). After 1 hr and 45 min, 5  $\mu$ l of 100X 4',6-diamididino-2-phenylindole (DAPI) was added  
597 and left to incubate with the secondaries for 15 min. Ovaries were then washed with PBST 3  
598 times for 15 min and mounted in Prolong Gold (Life Technologies, P36930) using an NA 1.5  
599 glass coverslip and frosted glass slides.

600 For STORM of C(3)G, ovary fixation and immunofluorescence was performed as  
601 described above with minor changes. The primary antibody was a mouse monoclonal anti-  
602 C(3)G C-terminal (1A8-1G2, used at 1:500, [23]) and the secondary antibody was Alexa Fluor  
603 647 mouse (used at 1:500; ThermoFisher, A21235). Since samples had to be imaged the same  
604 day they were mounted, secondary antibody incubation was left rocking on the nutator overnight  
605 at 4°C. Then, the sample was washed 2 times in PBST for 15 min each. No DAPI was added to  
606 these samples. Following the washes, the sample was optically cleared using 2,2-thiodiethanol  
607 (TDE; VWR, 700008-210). The sample was rocked on the nutator at room temperature for 10  
608 min each in 10% TDE in PBS, followed by 20% TDE in PBS, and finally in 50% TDE in PBS. For  
609 mounting, a mixture of TDE and VECTASHIELD (VWR, 101098-042) was used since it had  
610 been shown that low concentrations of VECTASHIELD allowed for blinking of the Alexa Fluor  
611 647 dye [52]. We found that for WT samples, a mixture of 91%TDE/9% VECTASHIELD resulted  
612 in robust blinking of the dye and higher VECTASHIELD concentrations stabilized the dye,  
613 preventing it from blinking. In *c(3)G<sup>ccA1</sup>* homozygotes and heterozygotes, we had to increase the  
614 concentration of VECTASHIELD to obtain the same robust blinking as WT, thus these samples

615 were mounted in 88%TDE/12% VECTASHIELD. All samples were mounted with NA1.5  
616 coverslips on glass slides and sealed using clear nail polish for STORM imaging that same day.

617 *Fluorescent BAC probes for fluorescent in situ hybridization (FISH)*

618 FISH probes were designed from bacterial artificial chromosomes (BACs) obtained from the  
619 Children's Hospital Oakland Research Institute (CHORI;  
620 <http://bacpacresources.org/library.php?id=30>). The following BACs were used: for 2L RP98-  
621 28O9 (polytene band 22A2-22A4), RP98-43K24 (polytene band 32E2-32F2), RP98-7D17  
622 (polytene band 38E4-38F4); for 3L RP98-2N23 (polytene band 61D-61E), RP98-26C20  
623 (polytene band 69B1-69C2), RP98-3J2 (polytene band 77F5-78B1); for the X RP98-3D13  
624 (polytene band 3C3-3C7), RP98-9H1 (polytene band 15C1-15D6).

625 Bacteria containing each BAC were grown on LB+chloramphenicol and the BACs were  
626 isolated using a modification of the QIAGEN Plasmid Midi Kit protocol (QIAGEN, 12143). A  
627 single bacteria colony was grown in 5 mL LB+chloramphenicol for 6–8 hours, then that culture  
628 was moved into 100 mL culture of LB+chloramphenicol and grown overnight. Next, cells were  
629 spun down in two 50-mL bottles at 4500 g for 20 min at 4°C and the supernatant was removed  
630 (Note: Can stop here and freeze cells at 80°C.) The pellets were resuspended in 10 mL Buffer  
631 P1 followed by adding 10 mL Buffer P2 to each bottle and gently mixed by inverting 4–6 times.  
632 Then, the tubes were incubated at room temp for 5 min. Chilled Buffer P3, 10 ml, was added to  
633 each tube and immediately mixed by gently inverting 4–6 times. The tubes were incubated on  
634 ice for 15 min. The lysed cells were centrifuged at  $\geq 20,000$  g for 30 min at 4°C (JA-20 rotor) and  
635 the supernatant was moved to a new tube followed by centrifugation at  $\geq 20,000$ g for 15 min at  
636 4°C (JA-20 rotor). The QIAGEN-tip 100 were equilibrated by applying 4 mL Buffer QBT and  
637 allowed to flow through the column by gravity. The two supernatants were pooled together and  
638 added to the QIAGEN-tip column allowing gravity flow to run the liquid through the column. The

639 QIAGEN-tip column was washed twice with 10 mL Buffer QC and the BACs were eluted off the  
640 column with 5 mL Buffer QF pre-warmed to 65°C. Following elution, the DNA was precipitated  
641 by adding 3.5 mL isopropanol, mixed well, and centrifuged at  $\geq 15,000g$  for 30 min at 4°C (JA-  
642 20 rotor). The DNA pellet was washed with 2 mL 70% ethanol and centrifuged at  $\geq 15,000g$  for  
643 10 min, then allowed to air dry for 5–10 min. The DNA was dissolved in 50  $\mu$ l of water, and  
644 additional water may need to be added to solubilize all the DNA.

645 To make the FISH probes, the BACs were PCR amplified using the Illustra GenomiPhi  
646 V2 DNA Amplification Kit (GE 25-6600-30). The concentration of the BAC DNA was determined  
647 using the Qubit and 10 ng of BAC DNA was used for one amplification reaction. The  
648 amplification reaction was performed as described in the kit protocol. To confirm that the  
649 amplification reaction worked, each sample was run on a DNA agarose gel to display a bright  
650 smear ranging from  $\geq 10$  kb–3 kb DNA sized fragments. Also, the Qubit dsDNA HS assay kit  
651 protocol (ThermoFisher, Q32851) was used to confirm that each amplification reaction had ~4–  
652 7 ng of DNA.

653 Next, the amplified BAC was restriction enzyme digested using AluI (NEB R137S), HaeII  
654 (NEB R107S), MseI (NEB R0525S), RsaI (NEB R0167S), MboI (NEB R0147S) and MspI (NEB  
655 R0106S). A 100- $\mu$ l digestion reaction was set up adding in all 20  $\mu$ l of the amplified BAC DNA,  
656 64.5  $\mu$ l of the New England BioLabs smart cut buffer, and 1  $\mu$ l of each restriction enzyme (for  
657 MspI, only 0.5  $\mu$ l was added). The digestion reaction was left overnight at 37°C in a  
658 thermocycler. Complete digestion of the BAC DNA was checked on a DNA agarose gel where  
659 most of the DNA fragments should be below the 500-bp DNA size marker. Following the  
660 digestion, the DNA was precipitated using 2.5 volumes 100% ethanol, 1/10 volume 3M sodium  
661 acetate, and 1  $\mu$ l of 20 mg/mL glycogen (ThermoFisher, 10814010). The precipitated DNA was  
662 washed using 70% ethanol and resuspended in 50–60  $\mu$ l of the labeling buffer from the ULYSIS  
663 Nucleic Acid Labeling Kits (ThermoFisher – AF647 kit, U21660; AF546 kit, U21652).

664 To label the DNA with AF647 or AF546, the ULYSIS Nucleic Acid Labeling Kits were  
665 used. For labeling, we used 10  $\mu$ l of the digested BAC DNA and followed the protocol provided  
666 in the ULYSIS kits. We removed the unreacted dyes from the labeling reaction using Centri-Sep  
667 Columns (Princeton Separation, CS-900). The protocol provided with the columns was used to  
668 remove the unreacted dyes, thereby isolating the fluorescently labeled BAC probes. The  
669 resulting labeled BAC DNA was stored at  $-20^{\circ}\text{C}$ .

#### 670 *Fluorescent in situ hybridization of ovaries*

671 Ovaries were dissected in PBST and fixed in a 3.7% formaldehyde and sodium cacodylate  
672 solution. A 2X fix buffer (200 mM sodium cacodylate pH7.2, 200 mM sucrose, 80 mM sodium  
673 acetate, 20 mM EGTA) was made in advance and stored in 500- $\mu$ l aliquots at  $-20^{\circ}\text{C}$ . The 1X fix  
674 solution (500  $\mu$ l 2X Fix buffer, 232  $\mu$ l 16% formaldehyde, 268  $\mu$ l sterile water) was made  
675 immediately prior to dissecting the ovaries and each ovary sample was fixed in 500  $\mu$ l of the 1X  
676 fix solution. Ovaries were fixed for 4 min rocking on the nutator at room temperature. Then, the  
677 ovaries were rinsed three times in 2X Saline Sodium Citrate buffer with 0.1% Tween-20 (SCCT)  
678 for 10 min each. Next, the ovary tips were clipped off using forceps to help isolate the  
679 germarium from the later stages of oogenesis. These tips were transferred into new thin-walled  
680 0.5-mL tubes and stepped into 2X SCCT with 50% formamide by sequentially adding each  
681 formamide solution for 10 min each while nutating. First, the tips were incubated in 500  $\mu$ l of a  
682 2X SCCT with 20% formamide, then 2X SCCT with 40% formamide, and finally 2X SCCT with  
683 50% formamide. The previous 2X SCCT with 50% formamide was removed and replaced with  
684 fresh 2X SCCT with 50% formamide that was then incubated in a thermocycler at  $37^{\circ}\text{C}$  for 1–2  
685 hr.

686 Following that incubation, the 2X SCCT with 50% formamide was removed and the  
687 hybridization mixture was added to the ovary tips. For all the BAC probes, the hybridization

688 mixture contained 2  $\mu$ l BAC probe labeled with AF647, 2  $\mu$ l BAC probe labeled with AF546, and  
689 36  $\mu$ l 1.1X hybridization solution (1.0 g dextran sulfate, 1.5 mL 20X SSC, 5 mL formamide,  
690 water up to 9 ml; made in advance and stored at 4°C). In a thermocycler, the probes and  
691 chromosomal DNA were denatured for 2 min at 91°C, then hybridized overnight at 37°C.

692 The following day 500  $\mu$ l 2X SCCT with 50% formamide was added to the hybridization  
693 mixture and left at 37°C to settle. Then, the solution was removed and the ovaries were washed  
694 with 2X SCCT with 50% formamide three times at 37°C for 20 min each. Next, the ovary tips  
695 were exchanged back into 2X SCCT without formamide while nutating at room temperature by  
696 adding 2X SCCT with 40% formamide for 10 min and then adding 2X SCCT with 20%  
697 formamide for 10 min. The ovaries were washed once with 2X SCCT for 10 min, then washed  
698 two more times with PBST for 10 min each. Then, block [1% Fraction V BSA in PBST] was  
699 added and ovary tips were incubated for 1 hr at room temperature on the nutator. The block was  
700 removed and primary antibodies were added in PBST and incubated overnight at 4°C on the  
701 nutator. For all FISH samples, a cocktail of three mouse monoclonal anti-C(3)G C-terminal  
702 antibodies (1A8–1G2, 5G4–1F1, 1G5–2F7; [23]) was added and each antibody was used at a  
703 dilution of 1:500.

704 Ovary tips were washed three times for 20 min each in PBST and the Alexa Fluor 488  
705 mouse secondary was added at a dilution of 1:500. The secondary antibody was incubated for 2  
706 hr rocking at room temperature. Then, 5  $\mu$ l of 100X DAPI was added and incubated for an  
707 additional 10 min. Next, the ovary tips were washed three times for 20 min each in PBST and  
708 mounted onto glass slides with NA1.5 coverslips in Prolong Gold. After 24 hr the slides were  
709 sealed using clear nail polish and kept at 4°C prior to imaging on the DeltaVision.

710 *DeltaVision and STORM microscopy*

711 Except for the STORM imaging (see below), all images were acquired on an inverted  
712 DeltaVision microscopy system (GE Healthcare) with an Olympus 100x Objective (UPlanSApo  
713 100x NA 1.40) and a high-resolution CCD camera. The images from the DeltaVision were  
714 deconvolved using SoftWorRx v. 6.5 software following the GE healthcare protocol. Images  
715 were cropped and brightness and contrast was slightly adjusted using ImageJ.

716 STORM Imaging was performed on an OMX V4 microscopy system (GE healthcare)  
717 with an Olympus 60x TIRF Objective (APO N 60x NA 1.49). Alexa Fluor 647 was continuously  
718 excited with a 642 nm laser without UV activation, and the emission photons were filtered using  
719 a band-pass emission filter (679/41, Semrock) and collected by a PCO-Edge sCMOS camera  
720 with an 80-nm pixel size. Laser intensity measured after the objective was 4–6 kW/cm<sup>2</sup>.  
721 16,000–20,000 frames were recorded for each STORM data with 12–15 ms exposure time  
722 depending on signal intensity.

### 723 *Meiotic recombination*

724 The multiply-marked *X* chromosome (*y sc cv v f y*<sup>+</sup>) used in all the *X* recombination assays  
725 carries two versions of the yellow gene: (1) a mutant version of the yellow gene at the genomic  
726 locus on the tip of the long arm of the *X* chromosome (represented as *y*) and (2) a wild type  
727 copy of the yellow gene that was integrated onto the short arm of the *X* chromosome on other  
728 side of the centromere (represented as *y*<sup>+</sup>). To assay the frequency of recombination on the *X*  
729 chromosome in *c(3)G<sup>ccΔ1</sup>* homozygotes, males of the genotype *w*<sup>+</sup>/*BsY*; *mm c(3)G<sup>ccΔ1</sup>/TM3*;  
730 *sv<sup>spa-pol</sup>/+* were crossed to *FM7w/y sc cv v f y*<sup>+</sup>; *D/TM3* virgin females. The *y sc cv v f y*<sup>+</sup>/*BsY*; *mm*  
731 *c(3)G<sup>ccΔ1</sup>/+*; *sv<sup>spa-pol</sup>/+* male progeny from this cross were then crossed to *w*<sup>+</sup>/*y w*; *mm*  
732 *c(3)G<sup>ccΔ1</sup>/TM3*; *sv<sup>spa-pol</sup>/+* virgin females, which generated females carrying *y sc cv v f y*<sup>+</sup>/*y w*; *mm*  
733 *c(3)G<sup>ccΔ1</sup>*; *sv<sup>spa-pol</sup>/+*. These females were crossed individually to *y sc cv v f y*<sup>+</sup>/*BsY* males and the  
734 female progeny were scored for the presence of the *sc*, *cv*, *v*, *f* and *y*<sup>+</sup> markers to determine the

735 *X* recombination frequency.  $c(3)G^{cc\Delta 1}$  heterozygotes were generated by crossing males of the  
736 genotype  $y w/BsY; mm c(3)G^{cc\Delta 1}/TM3; sv^{spa-pol}/+$  to  $FM7w/y sc cv v f y^+$  virgin females. The  
737 resulting female progeny of the genotype  $y sc cv v f y^+/y w; mm c(3)G^{cc\Delta 1}/+; sv^{spa-pol}/+$  were  
738 individually crossed to  $y sc cv v f y^+/BsY$  males. The *X* recombination frequency was determined  
739 by scoring the female progeny for the presence of *sc*, *cv*, *v*, *f* and  $y^+$  markers. To assay *X*  
740 recombination in WT,  $y w; sv^{spa-pol}$  virgin females were crossed to  $y sc cv v f y^+/BsY$  males. The  
741 virgin female progeny from this cross were individually crossed to  $y sc cv v f y^+/BsY$  males. The  
742 *X* recombination frequency was determined by scoring the female progeny for the presence of  
743 *sc*, *cv*, *v*, *f* and  $y^+$  markers.

744 To assay recombination frequency along the 2<sup>nd</sup> chromosome in  $c(3)G^{cc\Delta 1}$  homozygotes,  
745 virgin females of the genotype  $y w; +/+; c(3)G^{cc\Delta 1} ca; sv^{spa-pol}$  were crossed to  $w/y; net dpp dpy b$   
746  $pr cn/cyo; mm c(3)G^{cc\Delta 1}/TM3; sv^{spa-pol}/+$  males. Single virgin female progeny of the genotype  
747  $yw/w; net dpp dpy b pr cn/+; mm c(3)G^{cc\Delta 1}/c(3)G^{cc\Delta 1} ca; sv^{spa-pol}/+$  were crossed to  $w^+/y; net dpp$   
748  $dpy b pr cn$  males. The recombination frequency was determined by scoring the female progeny  
749 for the presence of *net*, *dpp*, *dpy*, *b*, *pr*, and *cn* markers. To assay recombination frequency  
750 along the 2<sup>nd</sup> chromosome in  $c(3)G^{cc\Delta 1}$  heterozygotes, virgin WT females were crossed to  $w/y;$   
751  $net dpp dpy b pr cn/cyo; mm c(3)G^{cc\Delta 1}/TM3; sv^{spa-pol}/+$  males. Single virgin female progeny of the  
752 genotype  $yw/w; net dpp dpy b pr cn/+; mm c(3)G^{cc\Delta 1}/+; sv^{spa-pol}/+$  were crossed to  $w^+/y; net dpp$   
753  $dpy b pr cn$  males. The recombination frequency was determined by scoring the female progeny  
754 for the presence of *net*, *dpp*, *dpy*, *b*, *pr*, and *cn* markers. Lastly, to assay recombination  
755 frequency along the 2<sup>nd</sup> chromosome in wild type, virgin WT females ( $y w; sv^{spa-pol}$ ) were crossed  
756 to  $w^+/y; net dpp dpy b pr cn$  males. Single virgin female progeny of this cross were then crossed  
757 to  $w^+/y; net dpp dpy b pr cn$  males. The 2<sup>nd</sup> recombination frequency was determined by scoring  
758 the female progeny for the presence of *net*, *dpp*, *dpy*, *b*, *pr*, and *cn* markers.



759 To assay recombination frequency along the 3<sup>rd</sup> chromosome in  $c(3)G^{cc\Delta 1}$  homozygotes,  
760 virgin females of the genotype  $y w/w^+; mm c(3)G^{cc\Delta 1}/TM3; sv^{spa-pol}/+$  were crossed to  $y w$ ;  
761  $c(3)G^{cc\Delta 1} ca; sv^{spa-pol}$  males. Single virgin female progeny of this cross that were homozygous for  
762 the  $c(3)G^{cc\Delta 1}$  deletion were then crossed to  $ru h th st cu sr e ca$  males. The recombination  
763 frequency was determined by scoring for the presence of  $ru, h, th, st,$  and  $cu$  in female progeny.  
764 To assay recombination frequency along the 3<sup>rd</sup> chromosome in  $c(3)G^{cc\Delta 1}$  heterozygotes, virgin  
765 wild type females were crossed to  $y w/w^+; mm c(3)G^{cc\Delta 1}; sv^{spa-pol}/+$  males. Single virgin female  
766 progeny of this cross were then crossed to  $ru h th st cu sr e ca$  males. The recombination  
767 frequency was determined by scoring for the presence of  $ru, h, th, st,$  and  $cu$  in female progeny.  
768 Lastly, to assay recombination frequency along the 3<sup>rd</sup> chromosome in WT, virgin WT females ( $y$   
769  $w; sv^{spa-pol}$ ) were crossed to  $ru h th st cu sr e ca$  males. Single virgin female progeny of this  
770 cross were then crossed to  $ru h th st cu sr e ca$  males. The recombination frequency was  
771 determined by scoring for the presence of  $ru, h, th, st,$  and  $cu$  in female progeny.

#### 772 *Meiotic nondisjunction*

773 For the X and 4<sup>th</sup> chromosome nondisjunction assay, we introduced  $y w$  marked X  
774 chromosomes and  $sv^{spa-pol}$  marked 4<sup>th</sup> chromosomes into the  $c(3)G^{cc\Delta 1} ca/TM3$  stock to create a  
775  $y w/y^+ Y; c(3)G^{cc\Delta 1}/TM3; sv^{spa-pol}$  stock. This was done by crossing males from  $y w/y^+ Y; Pr/TM3;$   
776  $sv^{spa-pol}$  to the  $c(3)G^{cc\Delta 1}/TM3$  stock. All nondisjunction assays were performed using the  $y w/y^+ Y;$   
777  $c(3)G^{cc\Delta 1}/TM3; sv^{spa-pol}$  stock. X and 4<sup>th</sup> chromosome nondisjunction was assayed by crossing  
778 virgin  $y w; c(3)G^{cc\Delta 1}; sv^{spa-pol}$  and  $y w; c(3)G^{cc\Delta 1}/+; sv^{spa-pol}$  females to  $attached-XY, y^+ v f B;$   
779  $C(4)RM, ci ey^R$  males, as described in Harris et al. 2003 (the *attached-XY* symbol represents the  
780 chromosome  $C(1;Y), IN(1)EN$ , which is arranged as such  $Y^S X \cdot Y^L$ ) [53]. Virgin homozygous  
781 females for  $c(3)G^{cc\Delta 1}$  were collected from the  $y w/y^+ Y; c(3)G^{cc\Delta 1}/TM3; sv^{spa-pol}$  stock. Virgin  
782 heterozygous  $c(3)G^{cc\Delta 1}$  females were created by crossing  $y w/y^+ Y; c(3)G^{cc\Delta 1}/TM3; sv^{spa-pol}$

783 males to  $y w$ ;  $sv^{spa-pol}$  virgin females and collecting the virgin female progeny that displayed the  
784 correct genotype ( $y w$ ;  $c(3)G^{cc\Delta 1}/+$ ;  $sv^{spa-pol}$ ).

785 In this assay, X chromosome nondisjunction at meiosis I will result in yellow white ( $y w$ )  
786 females, which are created by having the two maternal X chromosomes segregate to the same  
787 pole (also known as a diplo-X ova), or yellow-plus vermilion forked Bar ( $y^+ v f Bar$ ) males, which  
788 are created by the segregation of none of the maternal X chromosomes into the egg, resulting in  
789 an *attached-XY/0* male (also known as a nullo-X ova). Meiosis II nondisjunction is extremely  
790 rare and using this assay as described above, the meiosis II nondisjunctional progeny will  
791 phenocopy the meiosis I nondisjunctional progeny. Since  $c(3)G^{cc\Delta 1}$  mutants display no  
792 nondisjunction, we did not assay for meiosis II nondisjunction.

793  $4^{th}$  chromosome nondisjunction at meiosis I will result in sparkling poliart ( $sv^{spa-pol}$ )  
794 progeny, which are created by having the two maternal  $4^{th}$  chromosomes segregate to the same  
795 pole (also known as a diplo-4 ova), or cubitus interruptus eyeless Russian (*ci ey*) progeny,  
796 which are created by the segregation of none of the maternal  $4^{th}$  chromosomes into the egg,  
797 resulting in a *C(4)RM/0* progeny (also known as a nullo-4 ova). While rare, flies with four  $4^{th}$   
798 chromosomes are viable and indistinguishable from regular progeny.

## 799 **Quantification and statistical analysis**

### 800 *$\gamma$ H2AV, CID, and SC intensity quantifications*

801 Oocyte staging for the  $\gamma$ H2AV and CID quantifications was done according to Matthies et al.  
802 [54]. Briefly, the germarium was identified by DAPI staining and each region was defined by the  
803 pattern of SC staining. Region 2A contains at least 4 cells of the 16-cell cyst with either partially  
804 or fully assembled SC, and in region 2B only 2 cells contain full-length SC. Region 3 (stage 1) is  
805 at the base of the germarium where only 1 cell has full-length SC and the other cell has either  
806 fully disassembled or is in the process of disassembling the SC. The rest of the stages (stage

807 2–9) were defined by measuring the size of the oocyte. Stage 2 is 25x25  $\mu\text{m}$ , stage 3 is 35x35  
808  $\mu\text{m}$ , stage 4 is 40x50  $\mu\text{m}$ , stage 5 is 55x75  $\mu\text{m}$ , stage 6 is 60x85  $\mu\text{m}$ , and stage 7 is 70x115  $\mu\text{m}$ .  
809 Each oocyte was measured using the SoftWoRx software, then classified as the stage to which  
810 it was the closest in size. For stages 8 and 9 there is no quantitative way to measure the egg to  
811 determine these stages. Instead, stage 8 is defined by being bigger than a stage 7 with the  
812 oocyte cytoplasm occupying less than one-third of the egg. Stage 9 is defined by the oocyte  
813 cytoplasm occupying one-third of the egg and the follicle cells beginning to migrate over the  
814 oocyte.

815         Prior to the quantification of  $\gamma\text{H2AV}$  and CID foci, individual nuclei from each region and  
816 stage were 3D-cropped in ImageJ (NIH open source software). The number of foci present for  
817 both  $\gamma\text{H2AV}$  and CID foci was determined by analyzing each cropped nucleus in 3D and  
818 counting the number of foci. N value for both  $\gamma\text{H2AV}$  and CID data sets represents the number  
819 of nuclei scored in each stage. In the germarium, more nuclei can be scored in region 2A than in  
820 region 2B and region 3, thus the number of germaria analyzed varies accordingly, such that the  
821 total nuclei scored in each region was 30. The analysis of region 2A came from 4–7 individual  
822 germaria. The analysis of region 2B came from 13–19 individual germarium. The analysis of  
823 region 3 came from 30 individual germaria. A Wilcoxon rank sum test was used for the P-value  
824 calculation of the  $\gamma\text{H2AV}$  data.

825         To estimate protein density at different stages for the mutants acquired here, we  
826 performed quantitative imaging of the SC antibody Corolla labeled with Alexa Fluor 488. For this  
827 analysis, we assumed that the antibody penetration and epitope availability was the same  
828 between each of the regions/stages and for each mutant analyzed. SC intensity measurements  
829 were obtained by performing sum projections over SC regions and then measuring the  
830 integrated intensity of the sum projected region after subtracting the average intensity from a  
831 manually selected region near each individual SC. In some cases, the exposure time and laser

832 power were changed in order to obtain reasonable images of low-intensity SCs. In those cases,  
833 the intensity values were corrected to account for these changes.

#### 834 *Euchromatic FISH pairing quantification*

835 The same staging of the germarium as described above was done for the quantification of the  
836 euchromatic FISH pairing. To measure the distance between the FISH probe foci, a custom  
837 ImageJ plug-in was used. First, the two FISH probe foci were selected as points using the  
838 points tool and the coordinates of each point were recorded in the ROI manager. Then, the  
839 plugin measure “3D jru v1” was run to calculate the 3D distance (in  $\mu\text{m}$ ) between ROI point one  
840 and ROI point two (available at <http://research.stowers.org/imagejplugins>). A slice spacing of  
841 0.20 and pixel spacing of 0.06370 were used in the plugin to calculate the 3D distance between  
842 the foci. A locus was considered paired if the distance between the FISH probe foci was  $<0.75$   
843  $\mu\text{m}$  and unpaired if the distanced between the FISH probe foci was  $\geq 0.75 \mu\text{m}$ . The n value for  
844 this data is the number of nuclei scored. Similar to the  $\gamma\text{H2AV}$  and CID quantification, the  
845 number of germaria scored for region 2A, region 2B, and region 3 vary because the number of  
846 quantifiable nuclei in each region varies. For all the probes assayed, on average  $\sim 4$  germaria  
847 were scored for region 2A,  $\sim 8$  germaria were scored for region 2B, and  $\sim 13$  germaria were  
848 scored for region 3.

#### 849 *STORM quantification*

850 STORM data was analyzed through an open source ImageJ plug-in [55]. Briefly, the acquired  
851 image was smoothed by a Gaussian filter, and then each blinking molecule was fitted to a  
852 Gaussian function by maximum likelihood fitting. Individual molecule's position, photon counts  
853 and fitting standard deviation were stored for future processing. To correct and optimize the  
854 results of the analysis, only molecules having 1–16 nm localization precision and 80–160 nm

855 fitting standard deviation were chosen for rendering and quantification. Cross-correlation  
856 between subsets (~2000 frames) of localized molecules was calculated to correct lateral drift.

857 Measurements were performed using ImageJ and the following custom plugins:

858 fit\_multi\_gaussian\_jru\_v4; set\_multi\_plot\_offsets\_jru\_v1; resample\_plot\_jru\_v1;

859 normalize\_trajectories\_jru\_v1; average\_trajectories\_jru\_v1 (available at

860 <http://research.stowers.org/imagejplugins>). Measurements were performed on raw molecule

861 position accumulation images. Intensity (i.e. molecule position accumulation) profiles were then

862 averaged over a five-pixel-wide stripe perpendicular to the paired C(3)G C-terminal tracks.

863 Profile fits to double Gaussian functions were used to determine the centers of each profile.

864 Profiles were then realigned to these centers, normalized, and averaged to obtain the final

865 averaged histograms as described in [21]. This averaged profile was then fit to a double

866 Gaussian function, by nonlinear least squares as described in [56], using the open source tools

867 described above. Error analysis of the fit parameters was performed using a Monte Carlo

868 approach with 100 random simulations (also described in [56]). For wild type, n=26 SC

869 measurements; for  $c(3)G^{cc\Delta 1}$  heterozygotes, n = 34 SC measurements; and for  $c(3)G^{cc\Delta 1}$

870 homozygotes, n = 32 SC measurements. Standard t-test was used for statistical comparisons

871 between the  $c(3)G^{cc\Delta 1}$  mutants and WT.

#### 872 *Meiotic recombination quantification*

873 N values for the recombination assay refer to the number of progeny scored in each genotype.

874 For all the chromosomes assayed, map length was determined by dividing the number of

875 progeny that had a crossover between a given set of markers by the total number of progeny

876 scored for one genotype on a specific chromosome. For example, the map length from *sc-cv*

877 was determined by dividing the number of progeny that had a crossover between *sc-cv* markers

878 by the total number of X chromosome recombinant progeny scored for a specific genotype.

879 Interference was calculated by:  $1 - \frac{\text{observed double crossovers between adjacent intervals}}{\text{expected double crossovers between adjacent intervals}}$

880 The number of expected double crossovers occurring in adjacent intervals was determined from  
881 the WT recombination data by multiplying the map length of one interval by the map length of  
882 the adjacent interval and then multiplying by the total number of recombinants scored. For  
883 example, on the X chromosome the expected number of double crossovers occurring between  
884 the *sc-cv* and *cv-v* intervals was calculated by:

885 
$$\frac{\text{sc-cv recombinants}}{\text{total X recombinants}} \times \frac{\text{cv-v recombinants}}{\text{total X recombinants}} \times \text{total X recombinants}$$

886 The number of observed double crossovers between adjacent intervals was empirically  
887 determined from the raw data. The total number of noncrossovers (NCOs), single crossovers  
888 (SCOs), double crossovers (DCOs), triple crossovers (TCOs) and quad crossovers (QCOs)  
889 were empirically determined from the raw data. Exchange rank was determined according to the  
890 method in Weinstein [36, 57].

#### 891 *Meiotic nondisjunction quantification*

892 For both the X and 4<sup>th</sup> chromosomes, half of the progeny from the nondisjunction assay are  
893 inviable. Diplo-X ova are only viable when fertilized with sperm not carrying the *attached-XY*. If  
894 these ova are fertilized with sperm carrying the *attached-XY*, the resulting progeny will be  
895 *XX/attached-XY*, which is inviable. Nullo-X ova are only viable when fertilized with sperm  
896 carrying the *attached-XY*. If these ova are fertilized with sperm not carrying the *attached-XY*, the  
897 resulting progeny will not have any sex chromosomes, which is inviable. Since only half of the  
898 nondisjunctional progeny are recovered, we adjusted the total by doubling the number of X  
899 chromosome nondisjunctional progeny.

900 Nullo-4 flies, from nullo-4 ova fertilized by nullo-4 sperm, are not able to survive.

901 Additionally, haplo-4 *minute* flies (or a single 4/0) will occur as regular progeny from the cross,

902 but these flies are very poor and recorded but not scored in the nondisjunction tables. If both the  
903  $X$  and  $4^{th}$  chromosomes nondisjoin together ( $X-4$ ) only two of the four possible progeny are  
904 viable. Thus, we adjusted the total by doubling the number of the  $X-4$  nondisjunctional progeny.  
905 For both  $X$  and  $4$ , the frequency of nondisjunction was calculated as described in Hawley et al.  
906 1992 [40].

#### 907 **Data and software availability**

908 Primary data files for the figures in this paper are publicly accessible  
909 at [www.stowers.org/research/publications/odr](http://www.stowers.org/research/publications/odr). For data analysis, the custom ImageJ plugins  
910 used are available at [research.stowers.org/imagejplugins/zipped\\_plugins.html](http://research.stowers.org/imagejplugins/zipped_plugins.html).

#### 911 **Key resources table**

912 See document.

913

#### 914 **Acknowledgments**

915 We thank Claudio Sunkel for antibodies; past and present members of the Hawley lab for  
916 helpful discussion and comments on this manuscript especially Satomi Takeo, Cathy Lake,  
917 Rachel Nielsen, and Elisabeth Bauerly; Diana Libuda for comments on this manuscript; and  
918 Angela Miller for editorial and figure preparation assistance. R.S.H. is an American Cancer  
919 Society Research Professor.

920

#### 921 **References**

922 1. Hassold T, Hall H, Hunt P. The origin of human aneuploidy: where we have been, where  
923 we are going. *Human molecular genetics*. 2007;16 Spec No. 2:R203-8. Epub 2007/10/04. doi:  
924 10.1093/hmg/ddm243. PubMed PMID: 17911163.

- 925 2. Keeney S, Giroux CN, Kleckner N. Meiosis-specific DNA double-strand breaks are  
926 catalyzed by Spo11, a member of a widely conserved protein family. *Cell*. 1997;88(3):375-84.  
927 Epub 1997/02/07. PubMed PMID: 9039264.
- 928 3. Gray S, Cohen PE. Control of Meiotic Crossovers: From Double-Strand Break Formation  
929 to Designation. *Annual review of genetics*. 2016;50:175-210. doi: 10.1146/annurev-genet-  
930 120215-035111. PubMed PMID: 27648641; PubMed Central PMCID: PMC5319444.
- 931 4. Hunter N. Meiotic Recombination: The Essence of Heredity. *Cold Spring Harb Perspect*  
932 *Biol*. 2015. doi: 10.1101/cshperspect.a016618. PubMed PMID: 26511629.
- 933 5. Lange J, Yamada S, Tischfield SE, Pan J, Kim S, Zhu X, et al. The Landscape of Mouse  
934 Meiotic Double-Strand Break Formation, Processing, and Repair. *Cell*. 2016;167(3):695-708  
935 e16. doi: 10.1016/j.cell.2016.09.035. PubMed PMID: 27745971; PubMed Central PMCID:  
936 PMC5117687.
- 937 6. Pan J, Sasaki M, Kniewel R, Murakami H, Blitzblau HG, Tischfield SE, et al. A  
938 hierarchical combination of factors shapes the genome-wide topography of yeast meiotic  
939 recombination initiation. *Cell*. 2011;144(5):719-31. doi: 10.1016/j.cell.2011.02.009. PubMed  
940 PMID: 21376234; PubMed Central PMCID: PMC3063416.
- 941 7. Lake CM, Hawley RS. Becoming a crossover-competent DSB. *Semin Cell Dev Biol*.  
942 2016;54:117-25. doi: 10.1016/j.semcdb.2016.01.008. PubMed PMID: 26806636.
- 943 8. Xiang Y, Miller DE, Ross EJ, Sanchez Alvarado A, Hawley RS. Synaptonemal complex  
944 extension from clustered telomeres mediates full-length chromosome pairing in *Schmidtea*  
945 *mediterranea*. *Proc Natl Acad Sci U S A*. 2014;111(48):E5159-68. doi:  
946 10.1073/pnas.1420287111. PubMed PMID: 25404302; PubMed Central PMCID:  
947 PMC4260563.
- 948 9. Miller DE, Smith CB, Kazemi NY, Cockrell AJ, Arvanitakas AV, Blumenstiel JP, et al.  
949 Whole-Genome Analysis of Individual Meiotic Events in *Drosophila melanogaster* Reveals That  
950 Noncrossover Gene Conversions Are Insensitive to Interference and the Centromere Effect.  
951 *Genetics*. 2016;203(1):159-71. doi: 10.1534/genetics.115.186486. PubMed PMID: 26944917;  
952 PubMed Central PMCID: PMC4858771.
- 953 10. Lindsley DL, Sandler L. The genetic analysis of meiosis in female *Drosophila*  
954 *melanogaster*. *Philos Trans R Soc Lond B Biol Sci*. 1977;277(955):295-312. PubMed PMID:  
955 16292.
- 956 11. Hughes SE, Miller DE, Miller AL, Hawley RS. Female meiosis: synapsis, recombination  
957 and segregation in *Drosophila melanogaster*. *Genetics*. 2017;*in press*.
- 958 12. Tanneti NS, Landy K, Joyce EF, McKim KS. A pathway for synapsis initiation during  
959 zygotene in *Drosophila* oocytes. *Current biology : CB*. 2011;21(21):1852-7. doi:  
960 10.1016/j.cub.2011.10.005. PubMed PMID: 22036181.
- 961 13. Christophorou N, Rubin T, Huynh J-R. Synaptonemal Complex Components Promote  
962 Centromere Pairing in Pre-Meiotic Germ Cells. *PLoS Genet*. 2013.
- 963 14. Takeo S, Lake CM, Morais-de-Sa E, Sunkel CE, Hawley RS. Synaptonemal complex-  
964 dependent centromeric clustering and the initiation of synapsis in *Drosophila* oocytes. *Current*  
965 *biology : CB*. 2011;21(21):1845-51. doi: 10.1016/j.cub.2011.09.044. PubMed PMID: 22036182.
- 966 15. McKim KS, Green-Marroquin BL, Sekelsky JJ, Chin G, Steinberg C, Khodosh R, et al.  
967 Meiotic synapsis in the absence of recombination. *Science*. 1998;279(5352):876-8. PubMed  
968 PMID: 9452390.
- 969 16. Mehrotra S, McKim KS. Temporal analysis of meiotic DNA double-strand break  
970 formation and repair in *Drosophila* females. *PLoS Genet*. 2006;2(11):e200. doi:  
971 10.1371/journal.pgen.0020200. PubMed PMID: 17166055; PubMed Central PMCID:  
972 PMC1657055.
- 973 17. Libuda DE, Uzawa S, Meyer BJ, Villeneuve AM. Meiotic chromosome structures  
974 constrain and respond to designation of crossover sites. *Nature*. 2013;502(7473):703-6. doi:  
975 10.1038/nature12577. PubMed PMID: 24107990; PubMed Central PMCID: PMC3920622.



- 976 18. Hayashi M, Mlynarczyk-Evans S, Villeneuve AM. The synaptonemal complex shapes the  
977 crossover landscape through cooperative assembly, crossover promotion and crossover  
978 inhibition during *Caenorhabditis elegans* meiosis. *Genetics*. 2010;186(1):45-58. doi:  
979 10.1534/genetics.110.115501. PubMed PMID: 20592266; PubMed Central PMCID:  
980 PMCPMC2940310.
- 981 19. Zickler D, Kleckner N. Recombination, Pairing, and Synapsis of Homologs during  
982 Meiosis. *Cold Spring Harb Perspect Biol*. 2015;7(6). doi: 10.1101/cshperspect.a016626.  
983 PubMed PMID: 25986558; PubMed Central PMCID: PMCPMC4448610.
- 984 20. Zickler D, Kleckner N. Meiotic chromosomes: integrating structure and function. *Annual*  
985 *review of genetics*. 1999;33:603-754. doi: 10.1146/annurev.genet.33.1.603. PubMed PMID:  
986 10690419.
- 987 21. Cahoon CK, Yu Z, Wang Y, Guo F, Unruh JR, Slaughter BD, et al. Superresolution  
988 expansion microscopy reveals the three-dimensional organization of the *Drosophila*  
989 synaptonemal complex. *Proc Natl Acad Sci U S A*. 2017;114(33):E6857-E66. doi:  
990 10.1073/pnas.1705623114. PubMed PMID: 28760978; PubMed Central PMCID:  
991 PMCPMC5565445.
- 992 22. Page SL, Hawley RS. c(3)G encodes a *Drosophila* synaptonemal complex protein.  
993 *Genes & development*. 2001;15(23):3130-43. doi: 10.1101/gad.935001. PubMed PMID:  
994 11731477; PubMed Central PMCID: PMC312841.
- 995 23. Anderson LK, Royer SM, Page SL, McKim KS, Lai A, Lilly MA, et al. Juxtaposition of  
996 C(2)M and the transverse filament protein C(3)G within the central region of *Drosophila*  
997 synaptonemal complex. *Proc Natl Acad Sci U S A*. 2005;102(12):4482-7. doi:  
998 10.1073/pnas.0500172102. PubMed PMID: 15767569; PubMed Central PMCID: PMC555515.
- 999 24. Collins KA, Unruh JR, Slaughter BD, Yu Z, Lake CM, Nielsen RJ, et al. Corolla Is a  
1000 Novel Protein that Contributes to the Architecture of the Synaptonemal Complex of *Drosophila*.  
1001 *Genetics*. 2014. doi: 10.1534/genetics.114.165290. PubMed PMID: 24913682.
- 1002 25. Page SL, Khetani RS, Lake CM, Nielsen RJ, Jeffress JK, Warren WD, et al. Corona is  
1003 required for higher-order assembly of transverse filaments into full-length synaptonemal  
1004 complex in *Drosophila* oocytes. *PLoS Genet*. 2008;4(9):e1000194. doi:  
1005 10.1371/journal.pgen.1000194. PubMed PMID: 18802461; PubMed Central PMCID:  
1006 PMC2529403.
- 1007 26. Lake CM, Hawley RS. The molecular control of meiotic chromosomal behavior: events in  
1008 early meiotic prophase in *Drosophila* oocytes. *Annu Rev Physiol*. 2012;74:425-51. doi:  
1009 10.1146/annurev-physiol-020911-153342. PubMed PMID: 22335798.
- 1010 27. Jeffress JK, Page SL, Royer SK, Belden ED, Blumenstiel JP, Anderson LK, et al. The  
1011 formation of the central element of the synaptonemal complex may occur by multiple  
1012 mechanisms: the roles of the N- and C-terminal domains of the *Drosophila* C(3)G protein in  
1013 mediating synapsis and recombination. *Genetics*. 2007;177(4):2445-56. doi:  
1014 10.1534/genetics.107.078717. PubMed PMID: 17947423; PubMed Central PMCID:  
1015 PMC2219479.
- 1016 28. Tung KS, Roeder GS. Meiotic chromosome morphology and behavior in *zip1* mutants of  
1017 *Saccharomyces cerevisiae*. *Genetics*. 1998;149(2):817-32. PubMed PMID: 9611194; PubMed  
1018 Central PMCID: PMC1460213.
- 1019 29. Lake CM, Nielsen RJ, Guo F, Unruh JR, Slaughter BD, Hawley RS. Vilya, a component  
1020 of the recombination nodule, is required for meiotic double-strand break formation in *Drosophila*.  
1021 *eLife*. 2015;4:e08287. doi: 10.7554/eLife.08287. PubMed PMID: 26452093; PubMed Central  
1022 PMCID: PMCPMC4703084.
- 1023 30. Lake CM, Holsclaw JK, Bellendir SP, Sekelsky J, Hawley RS. The development of a  
1024 monoclonal antibody recognizing the *Drosophila melanogaster* phosphorylated histone H2A  
1025 variant ( $\gamma$ -H2AV). *G3 (Bethesda)*. 2013;3(9):1539-43. doi: 10.1534/g3.113.006833.  
1026 PubMed PMID: 23833215; PubMed Central PMCID: PMCPMC3755914.

- 1027 31. Zickler D, Kleckner N. A few of our favorite things: Pairing, the bouquet, crossover  
1028 interference and evolution of meiosis. *Semin Cell Dev Biol.* 2016;54:135-48. doi:  
1029 10.1016/j.semcdb.2016.02.024. PubMed PMID: 26927691; PubMed Central PMCID:  
1030 PMC4867269.
- 1031 32. Gowen JW. Meiosis as a genetic character in *Drosophila melanogaster*. *The Journal of*  
1032 *Experiment Zoology.* 1933;65(1):83-106.
- 1033 33. Hall JC. Chromosome segregation influenced by two alleles of the meiotic mutant c(3)G  
1034 in *Drosophila melanogaster*. *Genetics.* 1972;71(3):367-400. PubMed PMID: 4624918.
- 1035 34. Miller DE. Genomic analysis of meiosis in *Drosophila melanogaster* [dissertation].  
1036 Kansas City, KS: University of Kansas Medical Center; 2016.
- 1037 35. Ashburner M, Golic KG, Hawley RS. *Drosophila: A laboratory handbook.* 2 ed. Cold  
1038 Spring Harbor, New York: Cold Spring Harbor Laboratory Press; 2005.
- 1039 36. Weinstein A. Coincidence of Crossing over in DROSOPHILA MELANOGASTER  
1040 (AMPELOPHILA). *Genetics.* 1918;3(2):135-72. PubMed PMID: 17245901; PubMed Central  
1041 PMCID: PMC1200433.
- 1042 37. Yan R, McKee BD. The cohesion protein SOLO associates with SMC1 and is required  
1043 for synapsis, recombination, homolog bias and cohesion and pairing of centromeres in  
1044 *Drosophila* Meiosis. *PLoS Genet.* 2013;9(7):e1003637. doi: 10.1371/journal.pgen.1003637.  
1045 PubMed PMID: 23874232; PubMed Central PMCID: PMC3715423.
- 1046 38. Mason JM. Orientation disruptor (ord): a recombination-defective and disjunction-  
1047 defective meiotic mutant in *Drosophila melanogaster*. *Genetics.* 1976;84(3):545-72. PubMed  
1048 PMID: 826453; PubMed Central PMCID: PMC1213594.
- 1049 39. Baker BS, Hall JC. Meiotic mutants: genie control of meiotic recombination and  
1050 chromosome segregation. In: Ashburner M, Novitski E, editors. *The Genetics and Biology of*  
1051 *Drosophila.* 1a. New York: Academic Press; 1976.
- 1052 40. Hawley RS, Irick H, Zitron AE, Haddox DA, Lohe A, New C, et al. There are two  
1053 mechanisms of achiasmate segregation in *Drosophila* females, one of which requires  
1054 heterochromatic homology. *Dev Genet.* 1992;13(6):440-67. doi: 10.1002/dvg.1020130608.  
1055 PubMed PMID: 1304424.
- 1056 41. Hawley RS, Theurkauf WE. Requiem for distributive segregation: achiasmate  
1057 segregation in *Drosophila* females. *Trends Genet.* 1993;9(9):310-7. PubMed PMID: 8236460.
- 1058 42. Balicky EM, Endres MW, Lai C, Bickel SE. Meiotic cohesion requires accumulation of  
1059 ORD on chromosomes before condensation. *Molecular biology of the cell.* 2002;13(11):3890-  
1060 900. doi: 10.1091/mbc.E02-06-0332. PubMed PMID: 12429833; PubMed Central PMCID:  
1061 PMC133601.
- 1062 43. Khetani RS, Bickel SE. Regulation of meiotic cohesion and chromosome core  
1063 morphogenesis during pachytene in *Drosophila* oocytes. *Journal of cell science.* 2007;120(Pt  
1064 17):3123-37. doi: 10.1242/jcs.009977. PubMed PMID: 17698920.
- 1065 44. Krishnan B, Thomas SE, Yan R, Yamada H, Zhulin IB, McKee BD. Sisters unbound is  
1066 required for meiotic centromeric cohesion in *Drosophila melanogaster*. *Genetics.*  
1067 2014;198(3):947-65. doi: 10.1534/genetics.114.166009. PubMed PMID: 25194162; PubMed  
1068 Central PMCID: PMC4224182.
- 1069 45. Yan R, Thomas SE, Tsai JH, Yamada Y, McKee BD. SOLO: a meiotic protein required  
1070 for centromere cohesion, coorientation, and SMC1 localization in *Drosophila melanogaster*. *The*  
1071 *Journal of cell biology.* 2010;188(3):335-49. doi: 10.1083/jcb.200904040. PubMed PMID:  
1072 20142422; PubMed Central PMCID: PMC2819681.
- 1073 46. Gladstone MN, Obeso D, Chuong H, Dawson DS. The synaptonemal complex protein  
1074 Zip1 promotes bi-orientation of centromeres at meiosis I. *PLoS Genet.* 2009;5(12):e1000771.  
1075 doi: 10.1371/journal.pgen.1000771. PubMed PMID: 20011112; PubMed Central PMCID:  
1076 PMC2781170.

- 1077 47. Kurdzo EL, Obeso D, Chuong H, Dawson DS. Meiotic Centromere Coupling and Pairing  
1078 Function by Two Separate Mechanisms in *Saccharomyces cerevisiae*. *Genetics*.  
1079 2017;205(2):657-71. doi: 10.1534/genetics.116.190264. PubMed PMID: 27913618; PubMed  
1080 Central PMCID: PMCPMC5289843.
- 1081 48. Qiao H, Chen JK, Reynolds A, Hoog C, Paddy M, Hunter N. Interplay between  
1082 synaptonemal complex, homologous recombination, and centromeres during mammalian  
1083 meiosis. *PLoS Genet*. 2012;8(6):e1002790. doi: 10.1371/journal.pgen.1002790. PubMed PMID:  
1084 22761591; PubMed Central PMCID: PMC3386176.
- 1085 49. Carpenter A. Thoughts on recombination nodules, meiotic recombination, and  
1086 chiasmata. In: Kucherlapati R, Smith GR, editors. *Genetic Recombination*. Washington, DC:  
1087 American Society for Microbiology; 1988. p. 529-48.
- 1088 50. Mlynarczyk-Evans S, Villeneuve AM. Time-Course Analysis of Early Meiotic Prophase  
1089 Events Informs Mechanisms of Homolog Pairing and Synapsis in *Caenorhabditis elegans*.  
1090 *Genetics*. 2017;207(1):103-14. doi: 10.1534/genetics.117.204172. PubMed PMID: 28710064;  
1091 PubMed Central PMCID: PMCPMC5586365.
- 1092 51. Jaramillo-Lambert A, Ellefson M, Villeneuve AM, Engebrecht J. Differential timing of S  
1093 phases, X chromosome replication, and meiotic prophase in the *C. elegans* germ line. *Dev Biol*.  
1094 2007;308(1):206-21. doi: 10.1016/j.ydbio.2007.05.019. PubMed PMID: 17599823.
- 1095 52. Olivier N, Keller D, Rajan VS, Gonczy P, Manley S. Simple buffers for 3D STORM  
1096 microscopy. *Biomed Opt Express*. 2013;4(6):885-99. doi: 10.1364/BOE.4.000885. PubMed  
1097 PMID: 23761850; PubMed Central PMCID: PMCPMC3675867.
- 1098 53. Harris D, Orme C, Kramer J, Namba L, Champion M, Palladino MJ, et al. A deficiency  
1099 screen of the major autosomes identifies a gene (matrimony) that is haplo-insufficient for  
1100 achiasmate segregation in *Drosophila* oocytes. *Genetics*. 2003;165(2):637-52. PubMed PMID:  
1101 14573476; PubMed Central PMCID: PMCPMC1462769.
- 1102 54. Matthies HJG, Clarkson M, Saint RB, Namba R, Hawley RS. Analysis of meiosis in fixed  
1103 and live oocytes by light microscopy. In: Sullivan W, Ashburner M, Hawley RS, editors.  
1104 *Drosophila* protocols. Cold Spring Harbor, New York: Cold Spring Harbor Laboratory Press;  
1105 2000. p. 67-86.
- 1106 55. Ovesny M, Krizek P, Borkovec J, Svindrych Z, Hagen GM. ThunderSTORM: a  
1107 comprehensive ImageJ plug-in for PALM and STORM data analysis and super-resolution  
1108 imaging. *Bioinformatics*. 2014;30(16):2389-90. doi: 10.1093/bioinformatics/btu202. PubMed  
1109 PMID: 24771516; PubMed Central PMCID: PMCPMC4207427.
- 1110 56. Burns S, Avena JS, Unruh JR, Yu Z, Smith SE, Slaughter BD, et al. Structured  
1111 illumination with particle averaging reveals novel roles for yeast centrosome components during  
1112 duplication. *eLife*. 2015;4. doi: 10.7554/eLife.08586. PubMed PMID: 26371506; PubMed Central  
1113 PMCID: PMCPMC4564689.
- 1114 57. Hawley RS, Walker MY. *Advanced Genetic Analysis*. Malden, MA: Blackwell Publishing;  
1115 2009.

1116

1117

1118

1119

1120 **Figure Legends**

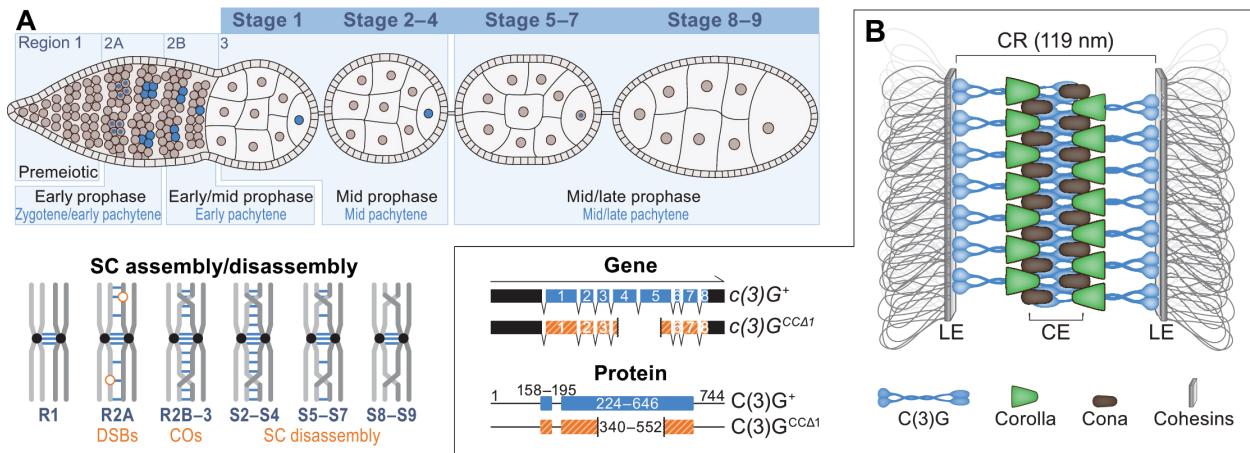

1121

1122 **Figure 1: Background on Drosophila female meiosis and the SC**

1123 (A) Diagram of Drosophila female meiosis, which is described in [11]. Briefly, at the anterior tip  
 1124 of the germarium is a germline stem cell that divides asymmetrically to give rise to a cystoblast,  
 1125 which undergoes four mitotic divisions with incomplete cytokinesis to give rise to a 16-cell cyst.  
 1126 Homologous chromosome pairing and SC assembly begin at the centromeres (represented as  
 1127 black dots on the chromosomes) during these mitotic divisions [13]. Then, four cells in the 16-  
 1128 cell cyst officially enter meiosis in region 2A (zygotene/early pachytene) by assembling the SC  
 1129 along the chromosome arms. During region 2A, DNA double-strand breaks (DSBs) are formed  
 1130 within the context of the SC, starting meiotic recombination. By region 2B (early pachytene), the  
 1131 fully synapsed cells have started to repair their DSBs and two of the four cells have backed out  
 1132 of the meiotic program. By region 3 (mid pachytene), the oocyte nucleus has been selected and  
 1133 is the only nucleus within the cyst that retains the SC—all other nuclei have backed out of  
 1134 meiosis and have disassembled their SC to become nurse cells. Additionally, all the DSBs are  
 1135 in the processes of being repaired into crossovers (COs) or noncrossovers by region 3. After  
 1136 the germarium, the oocyte continues to develop and the SC is maintained along the  
 1137 chromosome arms until stage 5. From stages 5–7 (mid/late pachytene), the SC is disassembled  
 1138 from multiple regions along the chromosome arms, but the SC persists at the centromere into

1139 the later stages of prophase I (stages 8–9) [12, 14]. (B) Model of the *Drosophila* SC with the  
1140 transverse filament protein C(3)G in blue, the central region (CR) protein Corolla in green, the  
1141 central element protein (CE) CONA in brown, and the lateral element (LE)/cohesin proteins  
1142 represented by gray (adapted from [11]). Next to the SC model are diagrams of the gene and  
1143 protein structures for wild type C(3)G<sup>+</sup> (blue) and *c(3)G<sup>ccΔ1</sup>* (orange).

1144

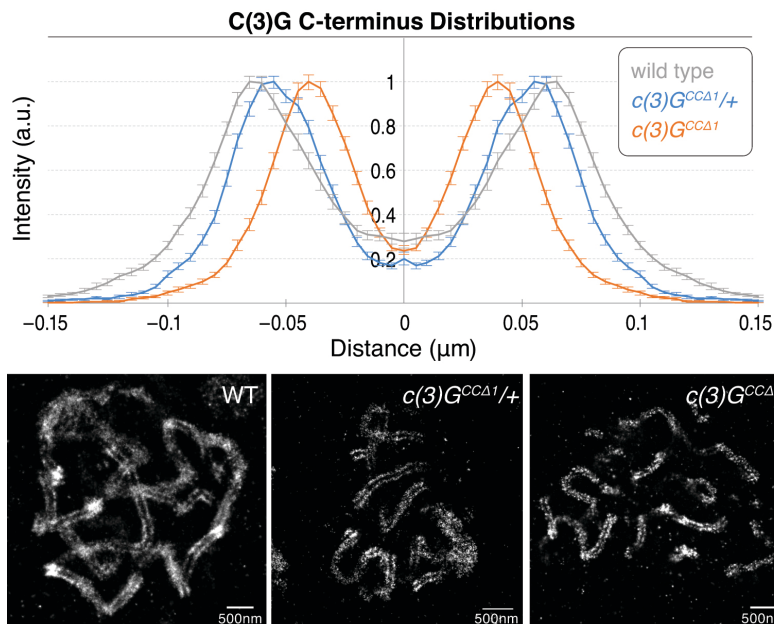

1145

## 1146 **Figure 2: STORM analysis of the SC structure in *c(3)G<sup>ccΔ1</sup>* mutants**

1147 STORM images of intact germaria with the C-terminus of C(3)G labeled in wild type (WT, grey),  
1148 *c(3)G<sup>ccΔ1</sup>* heterozygotes (*c(3)G<sup>ccΔ1</sup>/+*, blue) and homozygotes (*c(3)G<sup>ccΔ1</sup>*, orange). The  
1149 quantification above the images displays the average distribution of the two C-terminal C(3)G  
1150 tracks based on the line profile analysis of each genotype (see Methods). The quantification  
1151 resulted an average width of 119nm ± SE 1.0nm in WT, 107nm ± SE 0.4nm in *c(3)G<sup>ccΔ1</sup>*  
1152 heterozygotes, and 78.6nm ± SE 0.3nm in *c(3)G<sup>ccΔ1</sup>* homozygotes. The average distribution was  
1153 generated by averaging 26 line profiles from 8 WT nuclei, 34 line profiles from 17 *c(3)G<sup>ccΔ1</sup>*  
1154 heterozygous nuclei, and 32 line profiles from 13 *c(3)G<sup>ccΔ1</sup>* heterozygous nuclei.

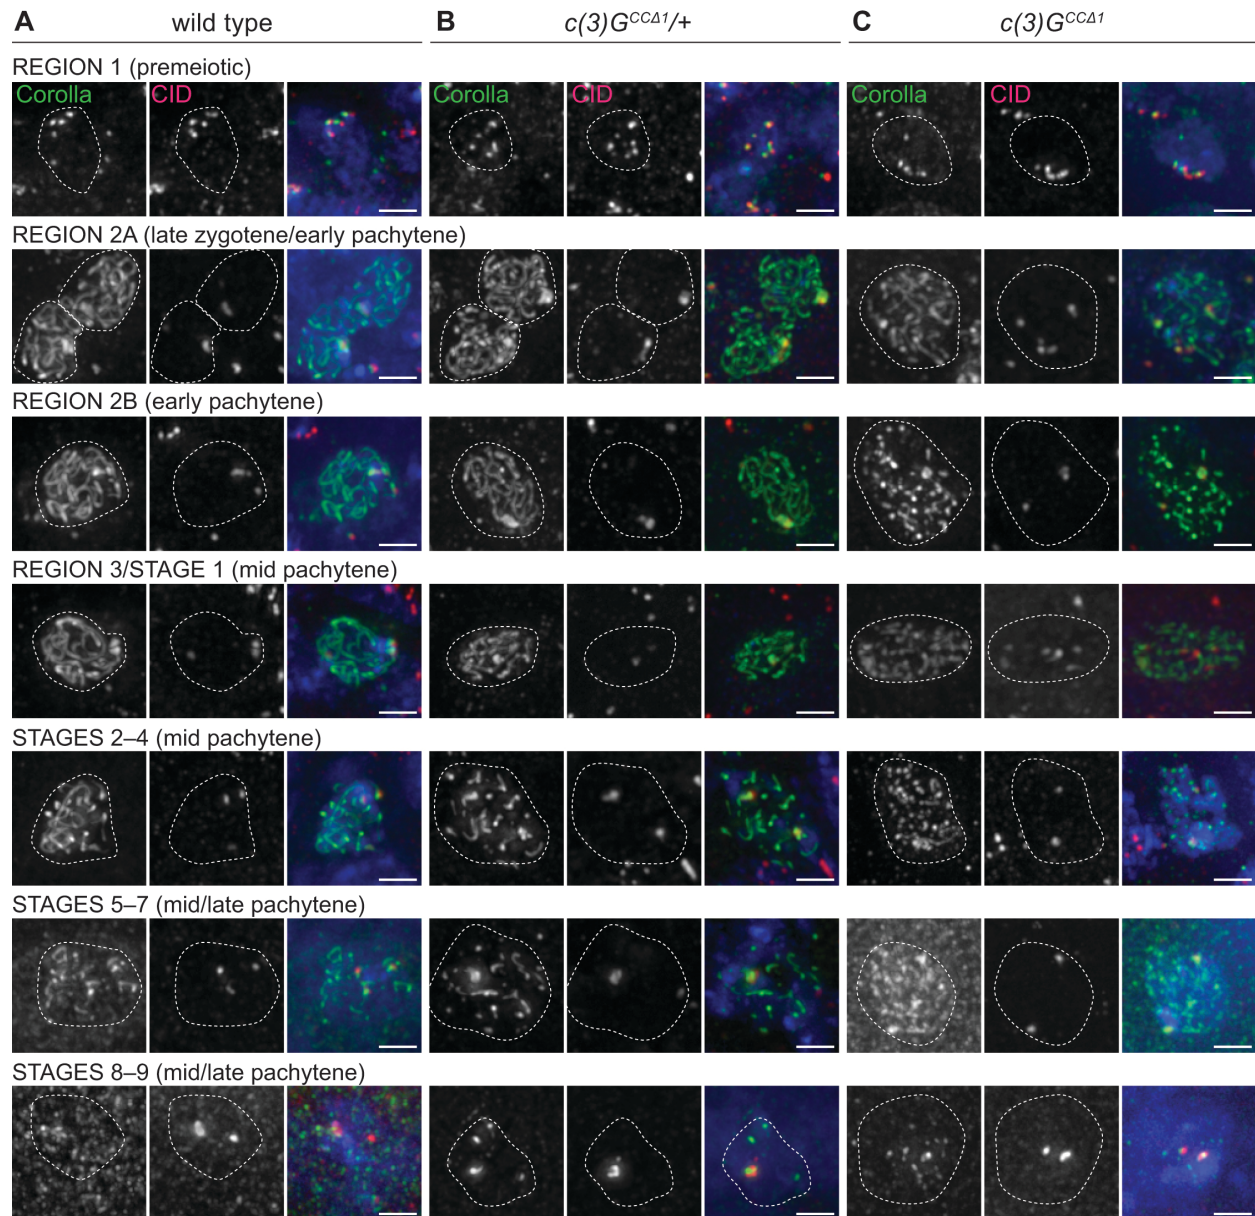

1156 **Figure 3: Euchromatic SC prematurely disassembles in both  $c(3)G^{cc\Delta1}$  homozygotes and**  
1157 **heterozygotes**

1158 (A) Images showing localization of the SC protein Corolla (green), the centromeric nucleosome  
1159 CID (red) and DAPI-stained DNA (blue) in wild type (A),  $c(3)G^{cc\Delta1/+}$  heterozygotes (B), and  
1160  $c(3)G^{cc\Delta1}$  homozygotes (C) from zygotene/early pachytene (region 2A) to mid/late pachytene  
1161 (stages 8-9). Dotted lines indicate the location of the nucleus as defined by DAPI staining  
1162 (blue). Scale bars, 2  $\mu$ m.

1163

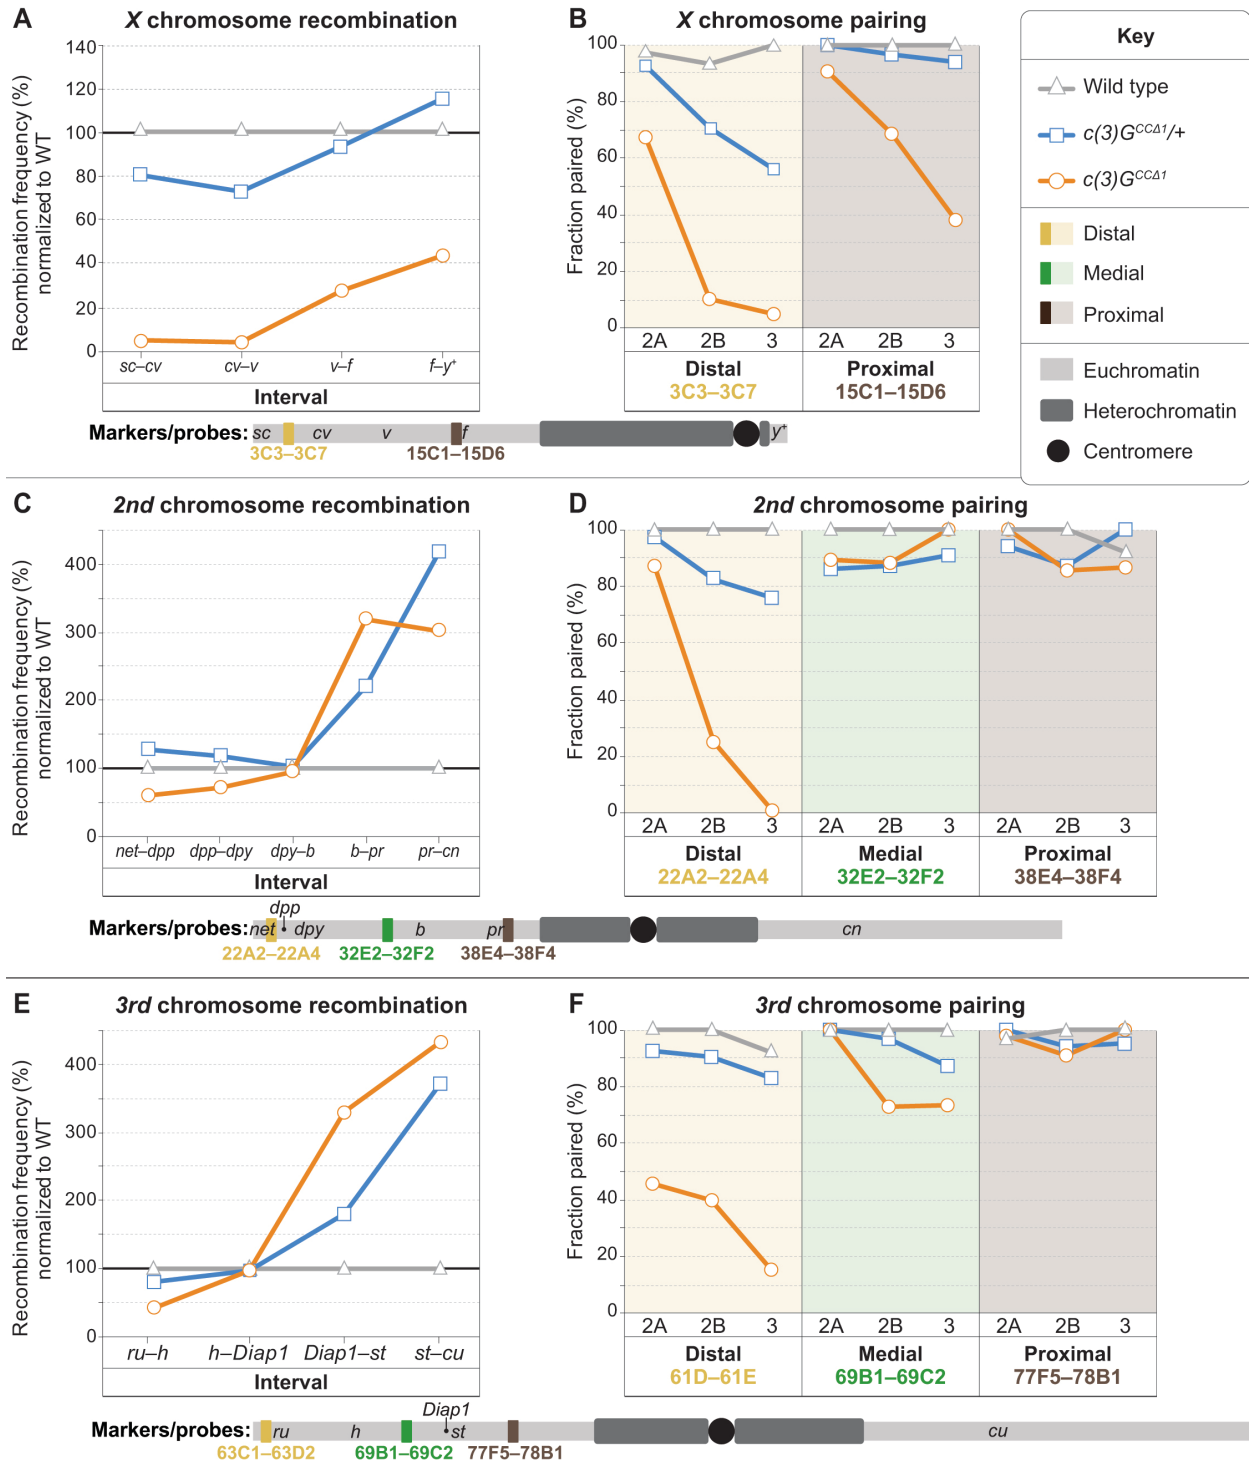

1164

1165 **Figure 4: *c(3)G<sup>CCΔ1</sup>* causes changes in recombination and euchromatic pairing on the X,**  
 1166 ***2<sup>nd</sup>* and *3<sup>rd</sup>* chromosomes**

1167 The frequency of recombination (A, C, E) and the fraction of euchromatic pairing (B, D, F) in  
1168 wild type (WT, grey triangles),  $c(3)G^{cc\Delta 1}$  heterozygotes [ $c(3)G^{cc\Delta 1}/+$ , blue squares] and  
1169 homozygotes [ $c(3)G^{cc\Delta 1}$ , orange circles] at distal (yellow), medial (green) and proximal (brown)  
1170 loci on the X, 2<sup>nd</sup> and 3<sup>rd</sup> chromosomes. The markers used to assay recombination on the X  
1171 chromosome are *scute* (*sc*), *crossveinless* (*cv*), *vermillion* (*v*), *forked* (*f*), and *yellow*<sup>+</sup> (*y*<sup>+</sup>,  
1172 integrated wild type allele). (The multiply marked X chromosome also carries a null mutant of  
1173 the *yellow* gene at the genomic locus, see Methods.) The markers used to assay recombination  
1174 on the 2<sup>nd</sup> chromosome are *net*, *decapentaplegic* (*dpp*), *dumpy* (*dpy*), *black* (*b*), *purple* (*pr*), and  
1175 *cinnabar* (*cn*). The markers used to assay recombination on the 3<sup>rd</sup> chromosome are *roughoid*  
1176 (*ru*), *hairy* (*h*), *thread* (*th*), *scarlet* (*st*), and *curled* (*cu*). For reference, below each set of charts is  
1177 a diagram of the corresponding chromosome being analyzed displaying the relative positions of  
1178 the recombination markers, locations of each FISH probe and the approximate amounts of  
1179 pericentromeric heterochromatin estimated from [35] (the black circle represents the  
1180 centromere; the chromosome diagrams do not include telomeric heterochromatin). The genomic  
1181 positions of all the markers and pairing probes within the figure are in Table S2 (base pair  
1182 numbers from flybase release FB2017\_06).

1183

1184

1185

1186

1187

1188

1189



1190

1191 **Supplemental Figure Legends**

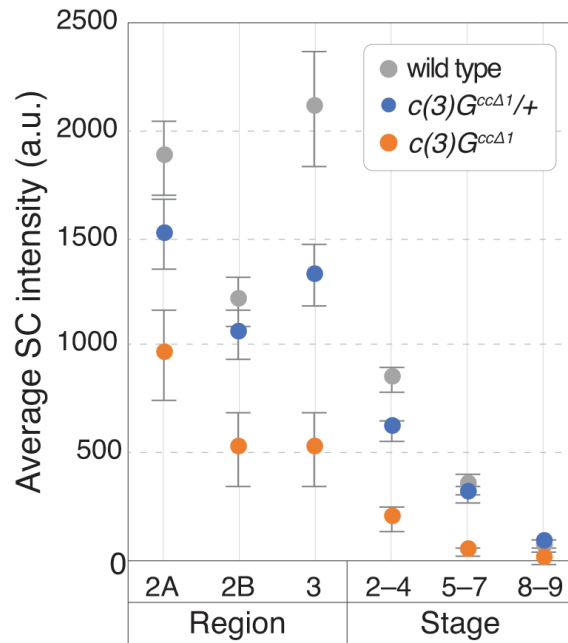

1192

1193 **Figure S1: SC intensity quantification**

1194 Average intensity of the Corolla antibody staining for wild type (grey),  $c(3)G^{cc\Delta 1}$  heterozygotes  
1195 ( $cc\Delta 1/+$ , blue) and homozygotes ( $cc\Delta 1$ , orange) from zygotene/early pachytene (region 2A) to  
1196 mid/late pachytene (stage 8–9). (See Methods for the detailed description of how this analysis  
1197 was performed). For WT, the average intensity was generated by averaging measurements  
1198 from 19 nuclei in region 2A, 18 nuclei in region 2B, 12 nuclei in region 3, 49 nuclei from stages  
1199 2–4, 39 nuclei from stages 5–7, and 18 nuclei from stages 8–9. For  $c(3)G^{cc\Delta 1}$  heterozygotes, the  
1200 average intensity was generated by averaging measurements from 16 nuclei in region 2A, 13  
1201 nuclei in region 2B, 19 nuclei in region 3, 46 nuclei from stages 2–4, 47 nuclei from stages 5–7,  
1202 and 34 nuclei from stages 8–9. For  $c(3)G^{cc\Delta 1}$  homozygotes, the average intensity was generated  
1203 by averaging measurements from 18 nuclei in region 2A, 11 nuclei in region 2B, 16 nuclei in  
1204 region 3, 42 nuclei from stages 2–4, 47 nuclei from stages 5–7, and 31 nuclei from stages 8–9.

1205

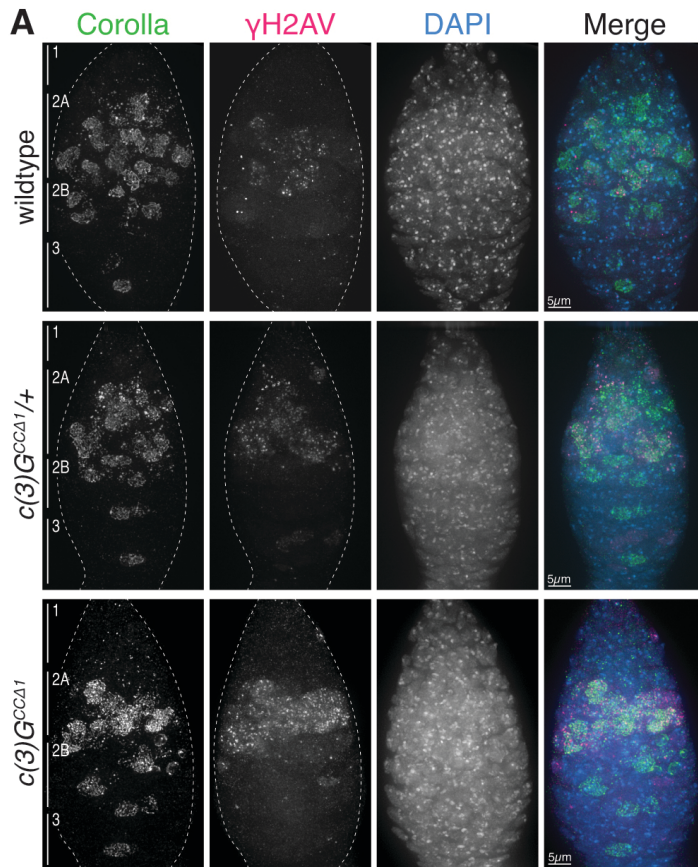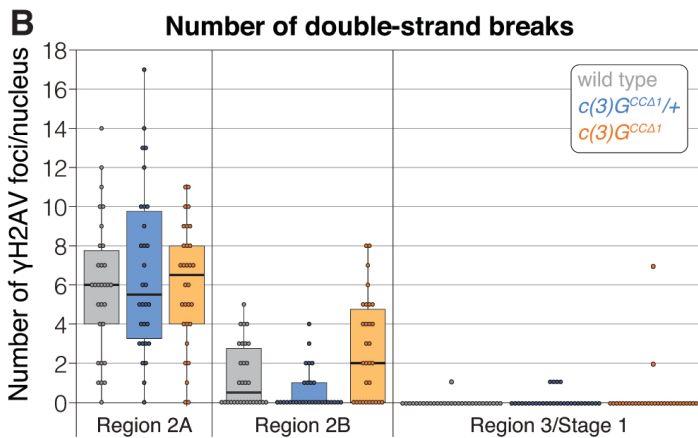

1206

1207 **Figure S2: The formation of double-strand breaks is normal in *c(3)G<sup>CCΔ1</sup>* mutants**

1208 (A) Images of the germarium stained with the SC protein Corolla (green),  $\gamma$ H2AV (magenta) and

1209 DAPI (blue) in WT and *c(3)G<sup>CCΔ1</sup>* heterozygotes (*c(3)G<sup>CCΔ1/+</sup>*) and homozygotes (*c(3)G<sup>CCΔ1</sup>*).

1210 Region 1, 2A, 2B, and 3 are labeled on the images as a reference. (B) Quantification of the

1211 number of DNA double-strand breaks as assayed by counting the number of  $\gamma$ H2AV foci per

1212 nucleus in each region of the germarium for WT and  $c(3)G^{cc\Delta 1}$  heterozygotes ( $c(3)G^{cc\Delta 1}/+$ ) and  
 1213 homozygotes ( $c(3)G^{cc\Delta 1}$ ).

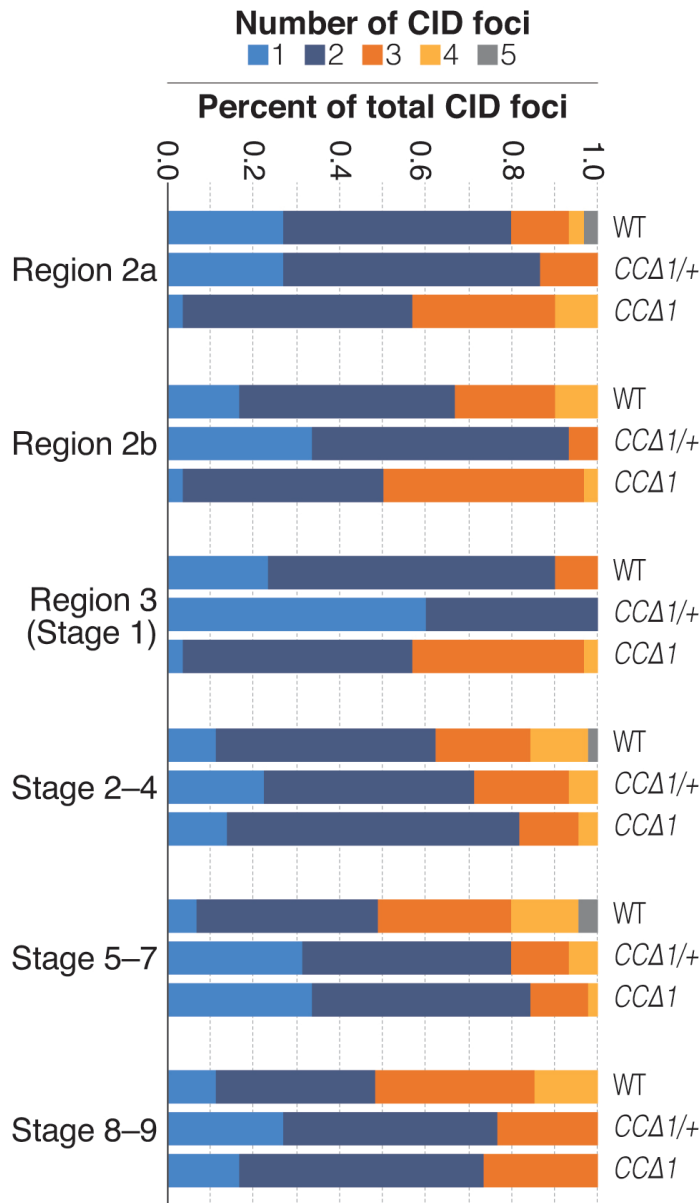

1214

1215 **Figure S3: Centromeric SC is unaffected by the  $c(3)G^{cc\Delta 1}$  mutation**

1216 Quantification of the percent of CID foci per nucleus in WT,  $c(3)G^{cc\Delta 1}$  heterozygotes ( $cc\Delta 1/+$ ),  
 1217 and homozygotes ( $cc\Delta 1$ ) from zygotene/early pachytene (region 2A) to mid/late pachytene  
 1218 (stage 8-9). (See Methods for a description of how this quantification was performed.)

1219 **Tables**

| <b>Table 1. X Chromosome Recombination</b> |                              |                                             |                                           |
|--------------------------------------------|------------------------------|---------------------------------------------|-------------------------------------------|
| Maternal genotype                          | <i>yw; pol</i><br>(N = 1515) | <i>c(3)G<sup>ccΔ1</sup>/+</i><br>(N = 1289) | <i>c(3)G<sup>ccΔ1</sup></i><br>(N = 1420) |
| <b>Map Length</b>                          |                              |                                             |                                           |
| <i>sc-cv</i>                               | 8.8                          | 7.1                                         | 0.4                                       |
| <i>cv-v</i>                                | 20.7                         | 11.9                                        | 0.7                                       |
| <i>v-f</i>                                 | 21.1                         | 17.7                                        | 5.2                                       |
| <i>f-y<sup>+</sup></i>                     | 12.4                         | 14.4                                        | 5.4                                       |
| <b>Total</b>                               | <b>63.0</b>                  | <b>51.2</b>                                 | <b>11.8</b>                               |
| <b>Interference</b>                        |                              |                                             |                                           |
| <i>sc/cv/v</i>                             | 0.7                          | 0.9                                         | 1.0                                       |
| <i>cv/v/f</i>                              | 0.6                          | 0.9                                         | 1.0                                       |
| <i>v/f/y<sup>+</sup></i>                   | 0.7                          | 0.9                                         | 0.9                                       |
| <b>Class</b>                               |                              |                                             |                                           |
| NCO                                        | 688                          | 702                                         | 1264                                      |
| SCO                                        | 703                          | 512                                         | 147                                       |
| DCO                                        | 120                          | 67                                          | 7                                         |
| TCO                                        | 4                            | 3                                           | 2                                         |
| <b>Exchange rank</b>                       |                              |                                             |                                           |
| <i>E<sub>0</sub></i>                       | 0.067                        | 0.201                                       | 0.790                                     |
| <i>E<sub>1</sub></i>                       | 0.627                        | 0.600                                       | 0.196                                     |
| <i>E<sub>2</sub></i>                       | 0.285                        | 0.180                                       | 0.003                                     |
| <i>E<sub>3</sub></i>                       | 0.021                        | 0.019                                       | 0.011                                     |
| <i>E<sub>4</sub></i>                       | 0                            | 0                                           | 0                                         |

1220 Abbreviations: N, total number of flies scored; NCO, chromatids recovered exhibiting no  
 1221 crossovers; SCO, single-crossover chromatids; DCO, double-crossover chromatids; TCO, triple-  
 1222 crossover chromatids.

1223

1224

1225

1226

1227

1228

1229

| <b>Table 2. 2nd Chromosome Recombination</b> |                              |                                             |                                           |
|----------------------------------------------|------------------------------|---------------------------------------------|-------------------------------------------|
| Maternal genotype                            | <i>yw; pol</i><br>(N = 2376) | <i>c(3)G<sup>ccΔ1</sup>/+</i><br>(N = 2471) | <i>c(3)G<sup>ccΔ1</sup></i><br>(N = 1456) |
| <b>Map Length</b>                            |                              |                                             |                                           |
| <i>net-dpp</i>                               | 5.7                          | 7.2                                         | 3.4                                       |
| <i>dpp-dpy</i>                               | 8.0                          | 9.5                                         | 5.8                                       |
| <i>dpy-b</i>                                 | 28.5                         | 29.5                                        | 26.9                                      |
| <i>b-pr</i>                                  | 7.8                          | 17.2                                        | 24.9                                      |
| <i>pr-cn</i>                                 | 2.2                          | 9.3                                         | 6.7                                       |
| <b>Total</b>                                 | <b>52.2</b>                  | <b>72.8</b>                                 | <b>67.6</b>                               |
| <b>Interference</b>                          |                              |                                             |                                           |
| <i>net/dpp/dpy</i>                           | 0.3                          | -0.7                                        | 0.8                                       |
| <i>dpp/dpy/b</i>                             | 0.6                          | -0.2                                        | 0.8                                       |
| <i>dpy/b/pr</i>                              | 0.6                          | -0.2                                        | -0.2                                      |
| <i>b/pr/cn</i>                               | -0.2                         | -5.3                                        | -2.2                                      |
| <b>Class</b>                                 |                              |                                             |                                           |
| NCO                                          | 1249                         | 1001                                        | 624                                       |
| SCO                                          | 1021                         | 1180                                        | 692                                       |
| DCO                                          | 98                           | 255                                         | 128                                       |
| TCO                                          | 8                            | 35                                          | 12                                        |
| QCO                                          | 0                            | 1                                           | 0                                         |
| <b>Exchange rank</b>                         |                              |                                             |                                           |
| $E_0$                                        | 0.134                        | 0.017                                       | 0.033                                     |
| $E_1$                                        | 0.715                        | 0.624                                       | 0.648                                     |
| $E_2$                                        | 0.125                        | 0.253                                       | 0.253                                     |
| $E_3$                                        | 0.027                        | 0.100                                       | 0.066                                     |
| $E_4$                                        | 0                            | 0.006                                       | 0                                         |

1230 Abbreviations: N, total number of flies scored; NCO, chromatids recovered exhibiting no  
 1231 crossovers; SCO, single-crossover chromatids; DCO, double-crossover chromatids; TCO, triple-  
 1232 crossover chromatids; QCO, quadruple-crossover chromatid.

1233

1234

1235

1236

1237

1238

1239

| <b>Table 3. 3rd Chromosome Recombination</b> |                |                               |                             |
|----------------------------------------------|----------------|-------------------------------|-----------------------------|
| Maternal genotype                            | <i>yw; pol</i> | <i>c(3)G<sup>ccΔ1</sup>/+</i> | <i>c(3)G<sup>ccΔ1</sup></i> |
|                                              | (N = 1014)     | (N = 1027)                    | (N = 1485)                  |
| <b>Map Length</b>                            |                |                               |                             |
| <i>ru-hu</i>                                 | 22.4           | 18.4                          | 9.5                         |
| <i>h-th</i>                                  | 21.8           | 21.5                          | 21.7                        |
| <i>th-st</i>                                 | 0.6            | 1.1                           | 2.0                         |
| <i>st-cu</i>                                 | 6.1            | 22.8                          | 26.5                        |
| <b>Total</b>                                 | <b>50.9</b>    | <b>63.8</b>                   | <b>59.6</b>                 |
| <b>Interference</b>                          |                |                               |                             |
| <i>ru/h/th</i>                               | 0.7            | 0.9                           | 0.5                         |
| <i>h/th/st</i>                               | 1              | 1                             | 0.2                         |
| <i>th/st/cu</i>                              | -4.5           | -4.5                          | -12.6                       |
| <b>Class</b>                                 |                |                               |                             |
| NCO                                          | 574            | 465                           | 746                         |
| SCO                                          | 420            | 470                           | 586                         |
| DCO                                          | 45             | 91                            | 146                         |
| TCO                                          | 2              | 1                             | 6                           |
| <b>Exchange rank</b>                         |                |                               |                             |
| $E_0$                                        | 0.168          | 0.083                         | 0.202                       |
| $E_1$                                        | 0.663          | 0.567                         | 0.420                       |
| $E_2$                                        | 0.154          | 0.343                         | 0.345                       |
| $E_3$                                        | 0.016          | 0.008                         | 0.032                       |
| $E_4$                                        | 0              | 0                             | 0                           |

1240 Abbreviations: N, total number of flies scored; NCO, chromatids recovered exhibiting no  
 1241 crossovers; SCO, single-crossover chromatids; DCO, double-crossover chromatids; TCO, triple-  
 1242 crossover chromatids.

1243

1244

1245

1246

1247

1248

1249

1250

**Table S1:** Average number of CID foci per stage of oogenesis\*

|                               | Stage 1         |                 |                 | Stage 2-4       | Stage 5-7       | Stage 8-9       |
|-------------------------------|-----------------|-----------------|-----------------|-----------------|-----------------|-----------------|
|                               | Region 2a       | Region 2b       | Region 3        |                 |                 |                 |
| <b>WT</b>                     | 2.0±SD 0.9 (30) | 2.3±SD 0.9 (30) | 1.9±SD 0.6 (30) | 2.4±SD 0.9 (45) | 2.7±SD 1.0 (45) | 2.6±SD 0.9 (27) |
| <b>c(3)G<sup>ccΔ1</sup>/+</b> | 1.9±SD 0.6 (30) | 1.7±SD 0.6 (30) | 1.4±SD 0.5 (30) | 2.4±SD 0.8 (45) | 2.0±SD 0.9 (45) | 2.0±SD 0.7 (30) |
| <b>c(3)G<sup>ccΔ1</sup></b>   | 2.5±SD 0.7 (30) | 2.5±SD 0.6 (30) | 2.4±SD 0.6 (30) | 2.1±SD 0.7 (44) | 1.8±SD 0.7 (45) | 2.1±SD 0.7 (30) |

\* SD=standard deviation; (n)=number of nuclei score

**Table S2: Genomic locations of recombination markers and pairing probes (from flybase release FB2017\_06)**

|                                                  | <b>Symbol/Band*</b> | <b>Genomic location**</b> |
|--------------------------------------------------|---------------------|---------------------------|
| X chromosome recombination markers               | <i>sc</i>           | XL: 396,060               |
|                                                  | <i>cv</i>           | XL: 5,690,002             |
|                                                  | <i>v</i>            | XL: 10,923,972            |
|                                                  | <i>f</i>            | XL: 17,232,942            |
|                                                  | <i>y+</i>           | XR: unknown               |
| 2 <sup>nd</sup> chromosome recombination markers | <i>net</i>          | 2L: 82,421                |
|                                                  | <i>dpp</i>          | 2L: 2,428,372             |
|                                                  | <i>dpy</i>          | 2L: 4,477,462             |
|                                                  | <i>b</i>            | 2L: 13,821,248            |
|                                                  | <i>pr</i>           | 2L: 20,073,719            |
|                                                  | <i>cn</i>           | 2R: 7,782,797             |
| 3 <sup>rd</sup> chromosome recombination markers | <i>ru</i>           | 3L: 1,370,628             |
|                                                  | <i>h</i>            | 3L: 8,675,759             |
|                                                  | <i>Diap1</i>        | 3L: 16,038,410            |
|                                                  | <i>st</i>           | 3L: 16,497,651            |
|                                                  | <i>cu</i>           | 3R: 11,197,592            |
| X chromosome pairing probes                      | 3C3–3C7             | XL: 2,907,702–3,141,427   |
|                                                  | 15C1–15D6           | XL: 16,900,783–17,066,397 |
| 2 <sup>nd</sup> chromosome pairing probes        | 22A2–22A4           | 2L: 1,428,615–1,645,199   |
|                                                  | 32E2–32F2           | 2L: 11,217,687–11,538,470 |
|                                                  | 38E4–38F4           | 2L: 20,722,927–20,910,490 |
| 3 <sup>rd</sup> chromosome pairing probes        | 63C1–63D2           | 3L: 756,009–1,080,330     |
|                                                  | 69B1–69C2           | 3L: 12,298,256–12,491,589 |
|                                                  | 77F5–78B1           | 3L: 20,914,572–21,101,191 |



\*Symbol = gene symbol of marker allele used to score recombination; band = location along polytene chromosome of probe used to score pairing

\*\*Molecular location of each marker/probe is approximate

**Table S3:** Percent paired at each euchromatic locus assayed\*

Chromosome 2L

| Genotype                      | Distal (2809:22A2-22A4) |            |            | Medial (43K24:32E2-32F2) |            |            | Proximal (7D17:38E4-38F4) |            |            |
|-------------------------------|-------------------------|------------|------------|--------------------------|------------|------------|---------------------------|------------|------------|
|                               | 2a                      | 2b         | 3          | 2a                       | 2b         | 3          | 2a                        | 2b         | 3          |
| WT                            | 100% (21)               | 100% (20)  | 100% (13)  | 100% (21)                | 100% (15)  | 100% (8)   | 100% (25)                 | 100% (23)  | 92.3% (13) |
| <i>c(3)G<sup>ccΔ1</sup>/+</i> | 97.7% (44)              | 82.6% (23) | 76.2% (21) | 86.2% (29)               | 87.5% (24) | 90.9% (11) | 94.1% (34)                | 87.1% (31) | 100% (16)  |
| <i>c(3)G<sup>ccΔ1</sup></i>   | 87.5% (24)              | 25% (20)   | 1% (9)     | 89.7% (29)               | 88.2% (17) | 100% (7)   | 100% (37)                 | 85.7% (28) | 86.7% (15) |

Chromosome 3L

| Genotype                      | Distal (2N23:61D-61E) |            |            | Medial (26C20:69B1-69C2) |            |             | Proximal (3J2:77F5-78B1) |            |            |
|-------------------------------|-----------------------|------------|------------|--------------------------|------------|-------------|--------------------------|------------|------------|
|                               | 2a                    | 2b         | 3          | 2a                       | 2b         | 3           | 2a                       | 2b         | 3          |
| WT                            | 100% (25)             | 100% (23)  | 92.3% (13) | 100% (31)                | 100% (25)  | 100% (13)   | 97.1% (35)               | 100% (34)  | 100% (14)  |
| <i>c(3)G<sup>ccΔ1</sup>/+</i> | 92.6% (27)            | 90.3% (21) | 83.3% (18) | 100% (32)                | 96.8% (31) | 87.5% (16)  | 100% (36)                | 94.4% (36) | 95.5% (22) |
| <i>c(3)G<sup>ccΔ1</sup></i>   | 45.8% (24)            | 40% (20)   | 15.4% (13) | 100% (33)                | 73.1% (26) | 73.68% (19) | 98.1% (54)               | 90.9% (33) | 100% (17)  |

Chromosome X

| Genotype                      | Distal (3D13:3C3-3C7) |            |            | Proximal (9H1:15C1-15D6) |            |            |
|-------------------------------|-----------------------|------------|------------|--------------------------|------------|------------|
|                               | 2a                    | 2b         | 3          | 2a                       | 2b         | 3          |
| WT                            | 97.4% (38)            | 93.8% (32) | 100% (13)  | 100% (43)                | 100% (44)  | 100% (18)  |
| <i>c(3)G<sup>ccΔ1</sup>/+</i> | 92.9% (42)            | 71.0% (31) | 56.3% (16) | 100% (35)                | 97.1% (35) | 94.1% (17) |
| <i>c(3)G<sup>ccΔ1</sup></i>   | 67.9% (28)            | 10.7% (28) | 5.3% (19)  | 90.6% (32)               | 69.0% (29) | 38.5% (13) |

\*(n) = number of nuclei scored

**Table S4:** Nondisjunction of X and 4<sup>th</sup> chromosomes

|            | Maternal genotype |                               |                             |
|------------|-------------------|-------------------------------|-----------------------------|
|            | <i>yw; pol</i>    | <i>c(3)G<sup>ccΔ1</sup>/+</i> | <i>c(3)G<sup>ccΔ1</sup></i> |
| Adj. total | 1348              | 1655                          | 954                         |
| % X        | 0.7               | 0.2                           | 1.5                         |
| % 4        | 0.4               | 0.1                           | 0.6                         |
